# Supplementary material for: Comparative genomic analysis of 127 Escherichia coli strains isolated from domestic animals with diarrhea in China
Source: PubMed Central journal article supplement (PMC6416869; doi:10.1186/s12864-019-5588-2), 2019-03-13
Supplement: 12864_2019_5588_MOESM1_ESM.pdf [file 12864_2019_5588_MOESM1_ESM.pdf]

**Table S1 Strains information**

| <b>Strain</b> | <b>Host</b> | <b>Collection year</b> | <b>Geographical location</b> | <b>Sample type</b> | <b>MLST type</b> | <b>O antigen</b> | <b>Pathotype</b> | <b>Scaffolds' No.</b> | <b>Average scaffold size</b> | <b>Coverage</b> |
|---------------|-------------|------------------------|------------------------------|--------------------|------------------|------------------|------------------|-----------------------|------------------------------|-----------------|
| swine1*       | swine       | 1981                   | China : Jilin                | not collected      | 48               | O22:H11          | DAEC             | 265                   | 32624                        | 137             |
| swine2*       | swine       | 1983                   | China : Shanghai             | not collected      | 100              | O149:H10         | ETEC             | 369                   | 35388                        | 108             |
| swine3*       | swine       | 1979                   | China : Beijing              | feces              | new3             | O54:H5           | EAEC             | 1590                  | 1661                         | 54              |
| swine4*       | swine       | 1980                   | China : Beijing              | not collected      | 10               | O23:H9           | ETEC             | 285                   | 36326                        | 136             |
| swine5*       | swine       | 1979                   | China : Beijing              | rectum             | new1             | O139:H1          | STEC             | 541                   | 16075                        | 152             |
| swine6*       | swine       | 1980                   | China : Guangxi              | rectum             | 93               | O7:H4            | EAEC             | 289                   | 28141                        | 146             |
| swine7*       | swine       | not collected          | China : Beijing              | not collected      | 5086             | O141:H5          | EAEC             | 595                   | 13195                        | 134             |
| swine8*       | swine       | 1979                   | China : Shanghai             | not collected      | 88               | O9:H12           | EAEC             | 288                   | 40191                        | 108             |
| swine9*       | swine       | 1981                   | China : Beijing              | small intestine    | 5086             | O101:H5          | STEC             | 420                   | 43730                        | 107             |
| swine10*      | swine       | not collected          | China : Shanghai             | small intestine    | 155              | O132:H21         | EAEC             | 328                   | 17495                        | 164             |

|          |       |      |                  |                 |      |          |      |     |       |     |
|----------|-------|------|------------------|-----------------|------|----------|------|-----|-------|-----|
| swine11* | swine | 1983 | China : Shanghai | small intestine | 155  | O132:H21 | EAEC | 231 | 51004 | 130 |
| swine12* | swine | 1983 | China : Zhejiang | not collected   | 90   | O8:H19   | ETEC | 300 | 44482 | 187 |
| swine13* | swine | 1979 | China : Beijing  | feces           | 2750 | O115:H10 | DAEC | 360 | 26164 | 120 |
| swine14* | swine | 1981 | China : Beijing  | not collected   | 10   | O101:H48 | EAEC | 228 | 38029 | 112 |
| swine15* | swine | 1981 | China : Beijing  | feces           | 5086 | O45:H5   | STEC | 392 | 23144 | 131 |
| swine16* | swine | 1984 | China : Shanghai | small intestine | 1611 | O64:H12  | EAEC | 248 | 40967 | 150 |
| swine18* | swine | 1983 | China : Beijing  | small intestine | 764  | O20:H21  | EAEC | 612 | 22112 | 140 |
| swine19  | swine | 2014 | China : Jiangsu  | feces           | 4214 | O130:H45 | STEC | 502 | 20258 | 111 |
| swine20  | swine | 2014 | China : Jiangsu  | feces           | 10   | O9:H9    | EAEC | 167 | 61402 | 139 |
| swine21  | swine | 2014 | China : Jiangsu  | feces           | 48   | O22:H11  | ETEC | 509 | 15054 | 142 |
| swine22  | swine | 2014 | China : Jiangsu  | feces           | 4214 | O130:H45 | STEC | 223 | 16133 | 140 |
| swine23  | swine | 2014 | China : Jiangsu  | feces           | 88   | O68:H11  | ETEC | 592 | 26977 | 178 |
| swine24* | swine | 1979 | China : Beijing  | small intestine | 100  | O149:H10 | STEC | 922 | 9372  | 133 |

|          |       |               |                  |               |      |          |      |     |        |     |
|----------|-------|---------------|------------------|---------------|------|----------|------|-----|--------|-----|
| swine25* | swine | 1976          | China : Beijing  | not collected | 5086 | O141:H12 | EAEC | 276 | 30985  | 126 |
| swine26* | swine | 1979          | China : Beijing  | not collected | 100  | O149:H10 | ETEC | 892 | 10528  | 123 |
| swine27* | swine | not collected | China : Beijing  | not collected | 1    | O139:H1  | STEC | 418 | 43560  | 98  |
| swine28  | swine | 2012          | China : Jiangsu  | rectum        | 10   | O145:H12 | EAEC | 80  | 153336 | 229 |
| swine29  | swine | 2012          | China : Jiangsu  | rectum        | 744  | O101:H9  | EAEC | 87  | 154371 | 287 |
| swine30  | swine | 2012          | China : Jiangsu  | rectum        | 405  | O102:H6  | EAEC | 122 | 102441 | 281 |
| swine31  | swine | 2012          | China : Jiangsu  | rectum        | 100  | O149:H10 | ETEC | 183 | 121367 | 338 |
| swine32  | swine | 2012          | China : Jiangsu  | rectum        | 542  | O14:H40  | EAEC | 95  | 127905 | 339 |
| swine33  | swine | 2012          | China : Jiangsu  | rectum        | 410  | O179:H9  | EAEC | 72  | 195833 | 452 |
| swine34  | swine | 2002          | China : jiangsxi | rectum        | 10   | O60:H5   | EAEC | 85  | 144863 | 616 |
| swine35  | swine | 2012          | China : Jiangsu  | rectum        | 1196 | O178:H28 | EAEC | 66  | 306168 | 538 |
| swine36  | swine | 2002          | China : Jiangxi  | rectum        | new2 | O178:H45 | EAEC | 137 | 71356  | 476 |
| swine37  | swine | 2012          | China : Jiangsu  | rectum        | 2496 | O20:H4   | EAEC | 137 | 85851  | 586 |

|         |       |      |                  |                 |      |          |      |     |        |     |
|---------|-------|------|------------------|-----------------|------|----------|------|-----|--------|-----|
| swine38 | swine | 2012 | China : Jiangsu  | rectum          | 2608 | O9:H4    | EAEC | 122 | 71216  | 485 |
| swine39 | swine | 2012 | China : Jiangsu  | rectum          | 1642 | O149:H7  | ETEC | 117 | 210337 | 545 |
| swine40 | swine | 2012 | China : Jiangsu  | rectum          | 405  | O102:H6  | EAEC | 110 | 131546 | 494 |
| swine41 | swine | 2001 | China : Anhui    | rectum          | 1408 | O129:H30 | EAEC | 99  | 150505 | 366 |
| swine42 | swine | 2012 | China : Jiangsu  | rectum          | 1011 | O160:H16 | EAEC | 56  | 318437 | 370 |
| swine43 | swine | 2012 | China : Jiangsu  | rectum          | 707  | O84:H23  | EAEC | 54  | 319584 | 392 |
| swine44 | swine | 2012 | China : Jiangsu  | rectum          | 58   | O20:H25  | EAEC | 121 | 99743  | 321 |
| swine45 | swine | 2001 | China : Zhejiang | rectum          | 2016 | O29:H12  | EAEC | 110 | 167024 | 327 |
| swine46 | swine | 2012 | China : Jiangsu  | rectum          | 209  | O20:H9   | EAEC | 96  | 124557 | 184 |
| swine47 | swine | 2004 | China : Zhejiang | rectum          | 100  | O149:H10 | STEC | 197 | 127935 | 313 |
| swine48 | swine | 2012 | China : Jiangsu  | rectum          | 5215 | O5:H11   | EAEC | 143 | 77898  | 375 |
| swine49 | swine | 2012 | China : Jiangsu  | rectum          | 746  | O141:H37 | EAEC | 113 | 99277  | 304 |
| swine50 | swine | 2003 | China : Shandong | small intestine | 114  | O139:H1  | STEC | 116 | 129352 | 421 |

|         |       |      |                   |        |      |          |      |     |        |     |
|---------|-------|------|-------------------|--------|------|----------|------|-----|--------|-----|
| swine51 | swine | 1996 | China:Guangdong   | rectum | new5 | O64:H20  | EAEC | 121 | 119246 | 417 |
| swine52 | swine | 2012 | China : Jiangsu   | rectum | 744  | O101:H9  | EAEC | 94  | 152878 | 569 |
| swine53 | swine | 2012 | China : Jiangsu   | rectum | 1421 | O9:H4    | EAEC | 127 | 93592  | 402 |
| swine54 | swine | 2012 | China : Jiangsu   | rectum | 4214 | O3:H45   | STEC | 251 | 58021  | 465 |
| swine55 | swine | 2003 | China : Jiangsu   | rectum | 23   | O8:H17   | EAEC | 113 | 115008 | 334 |
| swine56 | swine | 2012 | China : Jiangsu   | rectum | 3321 | O24:H34  | EAEC | 103 | 110900 | 329 |
| swine57 | swine | 2002 | China : Anhui     | rectum | 10   | O141:H4  | STEC | 160 | 121582 | 249 |
| swine58 | swine | 1996 | China : Guangdong | rectum | 10   | O8       | EAEC | 51  | 222374 | 324 |
| swine59 | swine | 2012 | China : Jiangsu   | rectum | 1642 | O149:H7  | EAEC | 41  | 282433 | 246 |
| swine60 | swine | 2012 | China             | rectum | 744  | O101:H9  | EAEC | 85  | 147464 | 264 |
| swine61 | swine | 2012 | China : Jiangsu   | rectum | 100  | O149:H10 | EAEC | 153 | 121288 | 218 |
| swine62 | swine | 1999 | China : Jiangsu   | rectum | 359  | O157:H21 | EAEC | 77  | 184702 | 235 |
| swine63 | swine | 2012 | China : Jiangsu   | rectum | 56   | O113:H21 | EAEC | 60  | 185128 | 259 |
| swine64 | swine | 2012 | China : Jiangsu   | rectum | 405  | O102:H6  | EAEC | 109 | 132028 | 246 |

|         |       |      |                 |          |      |         |      |     |        |     |
|---------|-------|------|-----------------|----------|------|---------|------|-----|--------|-----|
| swine65 | swine | 2012 | China : Jiangsu | rectum   | 457  | O11:H25 | EAEC | 68  | 199090 | 321 |
| swine66 | swine | 2012 | China : Jiangsu | rectum   | 354  | O1:H34  | EAEC | 68  | 192443 | 408 |
| swine67 | swine | 2012 | China : Jiangsu | rectum   | 4214 | O3:H45  | STEC | 232 | 59099  | 393 |
| swine68 | swine | 1999 | China : Jiangsu | duodenum | 10   | O141:H4 | STEC | 127 | 116158 | 302 |
| swine70 | swine | 2012 | China : Jiangsu | rectum   | 410  | O20:H9  | EAEC | 82  | 205939 | 323 |
| swine71 | swine | 2002 | China : Jiangxi | rectum   | 2525 | O3:H27  | EAEC | 145 | 96167  | 231 |
| swine72 | swine | 2002 | China : Jiangxi | rectum   | 201  | O8:H19  | EAEC | 66  | 215541 | 207 |
| -----   |       |      |                 |          |      |         |      |     |        |     |
| sheep1  | sheep | 2012 | China : Qinghai | feces    | 392  | O8:H2   | EAEC | 76  | 148857 | 350 |
| sheep2  | sheep | 2012 | China : Qinghai | feces    | 56   | O8:H21  | EAEC | 75  | 177205 | 231 |
| sheep3  | sheep | 2013 | China : Qinghai | feces    | 58   | O20:H25 | DAEC | 48  | 195635 | 310 |
| sheep4  | sheep | 2012 | China : Qinghai | feces    | 13   | O75:H8  | STEC | 100 | 157605 | 285 |
| sheep5  | sheep | 2012 | China : Qinghai | feces    | 675  | O76:H19 | STEC | 103 | 164880 | 245 |
| sheep6  | sheep | 2012 | China : Qinghai | feces    | 392  | O8:H2   | EAEC | 72  | 151062 | 297 |

|         |       |      |                 |       |      |          |      |     |        |     |
|---------|-------|------|-----------------|-------|------|----------|------|-----|--------|-----|
| sheep7  | sheep | 2013 | China : Qinghai | feces | 602  | O15:H21  | EAEC | 66  | 185142 | 274 |
| sheep8  | sheep | 2013 | China : Qinghai | feces | 602  | O15:H21  | EAEC | 68  | 214914 | 221 |
| sheep9  | sheep | 2013 | China : Qinghai | feces | 23   | O8:H9    | DAEC | 59  | 432670 | 211 |
| sheep10 | sheep | 2013 | China : Qinghai | feces | new6 | O4:H31   | EAEC | 57  | 171004 | 258 |
| sheep11 | sheep | 2013 | China : Qinghai | feces | 40   | O174:H21 | STEC | 114 | 131801 | 249 |
| sheep12 | sheep | 2013 | China : Qinghai | feces | 602  | O15:H21  | EAEC | 60  | 214406 | 198 |
| sheep13 | sheep | 2013 | China : Qinghai | feces | 58   | O88:H21  | EAEC | 69  | 182933 | 295 |
| sheep14 | sheep | 2013 | China : Qinghai | feces | 23   | O8:H9    | DAEC | 52  | 390296 | 206 |
| sheep15 | sheep | 2013 | China : Qinghai | feces | 58   | O88:H21  | EAEC | 74  | 178419 | 265 |
| sheep16 | sheep | 2013 | China : Qinghai | feces | new6 | O4:H31   | EAEC | 55  | 177524 | 254 |
| sheep17 | sheep | 2013 | China : Qinghai | feces | 73   | O50:H1   | EAEC | 58  | 287834 | 237 |
| sheep18 | sheep | 2013 | China : Qinghai | feces | new6 | O4:H31   | EAEC | 54  | 178959 | 253 |
| sheep19 | sheep | 2013 | China : Qinghai | feces | new6 | O4:H31   | EAEC | 51  | 184672 | 177 |

|         |       |      |                 |       |      |          |      |     |        |     |
|---------|-------|------|-----------------|-------|------|----------|------|-----|--------|-----|
| sheep20 | sheep | 2013 | China : Qinghai | feces | 3285 | O112:H8  | EAEC | 68  | 131466 | 241 |
| sheep21 | sheep | 2013 | China : Qinghai | feces | new6 | O4:H31   | EAEC | 61  | 170965 | 339 |
| sheep22 | sheep | 2013 | China : Qinghai | feces | new6 | O4:H31   | EAEC | 51  | 178949 | 182 |
| sheep23 | sheep | 2013 | China : Qinghai | feces | 13   | O174:H8  | STEC | 84  | 171682 | 224 |
| sheep24 | sheep | 2013 | China : Qinghai | feces | 278  | O20:H7   | STEC | 69  | 166996 | 212 |
| sheep25 | sheep | 2013 | China : Qinghai | feces | 501  | O17:H1   | EAEC | 80  | 238001 | 197 |
| sheep26 | sheep | 2013 | China : Qinghai | feces | 501  | O17:H1   | EAEC | 80  | 247621 | 255 |
| sheep27 | sheep | 2013 | China : Qinghai | feces | 25   | O128:H2  | STEC | 126 | 158780 | 286 |
| sheep28 | sheep | 2013 | China : Qinghai | feces | 29   | O177:H11 | EPEC | 177 | 130566 | 229 |
| sheep29 | sheep | 2013 | China : Qinghai | feces | 48   | O15:H11  | EAEC | 66  | 147408 | 339 |
| sheep30 | sheep | 2013 | China : Qinghai | feces | 13   | O174:H8  | STEC | 81  | 199279 | 175 |
| sheep31 | sheep | 2013 | China : Qinghai | feces | 13   | O174:H8  | STEC | 85  | 199276 | 323 |
| sheep32 | sheep | 2013 | China : Qinghai | feces | 17   | O45:H2   | EPEC | 176 | 119343 | 216 |



|         |       |      |                 |       |      |          |      |     |        |     |
|---------|-------|------|-----------------|-------|------|----------|------|-----|--------|-----|
| sheep33 | sheep | 2013 | China : Qinghai | feces | 744  | O101:H9  | EAEC | 102 | 147468 | 227 |
| sheep34 | sheep | 2013 | China : Qinghai | feces | 345  | O46:H21  | EAEC | 61  | 183978 | 221 |
| sheep35 | sheep | 2013 | China : Qinghai | feces | 744  | O101:H9  | EAEC | 101 | 131102 | 306 |
| sheep36 | sheep | 2013 | China : Qinghai | feces | 58   | O20:H25  | DAEC | 53  | 193588 | 202 |
| sheep37 | sheep | 2013 | China : Qinghai | feces | 746  | O20:H4   | EAEC | 90  | 124346 | 249 |
| sheep38 | sheep | 2013 | China : Qinghai | feces | 746  | O116:H4  | EAEC | 106 | 108081 | 184 |
| sheep39 | sheep | 2013 | China : Qinghai | feces | 746  | O116:H4  | EAEC | 90  | 108089 | 207 |
| sheep40 | sheep | 2014 | China : Qinghai | feces | 48   | O5:H11   | EAEC | 76  | 114991 | 204 |
| sheep41 | sheep | 2014 | China : Qinghai | feces | 4204 | O6:H10   | EAEC | 59  | 181835 | 190 |
| sheep42 | sheep | 2013 | China : Qinghai | feces | 3234 | O59:H8   | EAEC | 54  | 191572 | 287 |
| sheep43 | sheep | 2013 | China : Qinghai | feces | 58   | O88:H4   | DAEC | 81  | 227799 | 172 |
| sheep44 | sheep | 2013 | China : Qinghai | feces | 29   | O177:H11 | EPEC | 177 | 125433 | 186 |
| sheep45 | sheep | 2013 | China : Qinghai | feces | 58   | O20:H25  | DAEC | 41  | 236149 | 134 |

|          |       |      |                   |               |      |          |      |     |        |     |
|----------|-------|------|-------------------|---------------|------|----------|------|-----|--------|-----|
| sheep46  | sheep | 2013 | China : Qinghai   | feces         | 3234 | O174:H8  | EAEC | 47  | 213701 | 129 |
| sheep47  | sheep | 2013 | China : Qinghai   | feces         | 641  | O91:H21  | EAEC | 54  | 148807 | 154 |
| sheep48  | sheep | 2013 | China : Qinghai   | feces         | 602  | O51:H4   | EAEC | 105 | 145361 | 142 |
| sheep49  | sheep | 2013 | China : Qinghai   | feces         | 641  | O91:H21  | EAEC | 54  | 168101 | 119 |
| sheep50  | sheep | 2013 | China : Qinghai   | feces         | 29   | O177:H11 | EPEC | 172 | 128988 | 117 |
| sheep51  | sheep | 2013 | China : Qinghai   | feces         | 3234 | O174:H8  | EAEC | 49  | 213705 | 135 |
| sheep52  | sheep | 2013 | China : Qinghai   | feces         | new4 | O179:H8  | EAEC | 37  | 236083 | 123 |
| sheep53  | sheep | 2013 | China : Qinghai   | feces         | 602  | O15:H21  | EAEC | 60  | 186520 | 181 |
| sheep54  | sheep | 2013 | China : Qinghai   | feces         | 17   | O45:H2   | EPEC | 176 | 115747 | 166 |
| sheep55* | sheep | 1980 | China : Neimenggu | not collected | 23   | O78:H9   | EAEC | 223 | 41050  | 135 |
| sheep56* | sheep | 1980 | China : Neimenggu | not collected | 5236 | O45:H19  | EAEC | 191 | 46674  | 127 |
| sheep57* | sheep | 1984 | China : Xinjiang  | not collected | 5086 | O25:H5   | EAEC | 311 | 31941  | 143 |

Note: “\*” represents that strains were purchased from China Veterinary Culture Collection Center. Other strains were isolated by authors in this study.

**Table S2 Percentage of strain type**

| VFs                           | Proportion of VF in distinct groups |                | P value (Fisher's exact test) | Adjusted P value (Bonferroni correction) |
|-------------------------------|-------------------------------------|----------------|-------------------------------|------------------------------------------|
|                               | sheep isolates                      | swine isolates | swine-sheep                   | swine-sheep                              |
| <i>fepA</i>                   | 1                                   | 1              | 1                             | 1.27E+00                                 |
| <i>malX</i>                   | 1                                   | 1              | 1                             | 1.12E+00                                 |
| <i>guaA</i>                   | 0.964912281                         | 1              | 0.199475066                   | 8.35E-01                                 |
| <i>CsgC</i>                   | 1                                   | 0.985714286    | 1                             | 1.31E+00                                 |
| <i>dsdA</i>                   | 1                                   | 0.971428571    | 0.501312336                   | 9.96E-01                                 |
| <i>feoB</i>                   | 1                                   | 0.985714286    | 1                             | 1.28E+00                                 |
| <i>Hcp</i>                    | 0.964912281                         | 0.985714286    | 0.587086614                   | 1.03E+00                                 |
| <i>CSI</i>                    | 0.035087719                         | 0.328571429    | 2.59E-05                      | 5.88E-04                                 |
| <i>csgA</i>                   | 0.087719298                         | 0.914285714    | 1.06E-10                      | 8.43E-09                                 |
| <i>fimA</i>                   | 0.052631579                         | 0.771428571    | 2.73E-11                      | 4.34E-09                                 |
| <i>paa</i>                    | 0.01754386                          | 0.271428571    | 4.53E-05                      | 9.01E-04                                 |
| <i>yadN</i>                   | 0.631578947                         | 0.857142857    | 0.00385054                    | 3.83E-02                                 |
| <i>cadA</i>                   | 0.807017544                         | 0.985714286    | 0.001128366                   | 1.50E-02                                 |
| <i>STb/ST2</i>                | 0                                   | 0.228571429    | 5.00E-05                      | 8.83E-04                                 |
| <i>Urease beta subunit</i>    | 0                                   | 0.157142857    | 0.001055763                   | 1.68E-02                                 |
| <i>hlyC</i>                   | 0                                   | 0.157142857    | 0.001055763                   | 1.53E-02                                 |
| <i>hek</i>                    | 0                                   | 0.142857143    | 0.002103479                   | 2.57E-02                                 |
| <i>hra</i>                    | 0                                   | 0.142857143    | 0.002103479                   | 2.39E-02                                 |
| <i>SepA</i>                   | 0                                   | 0.128571429    | 0.004177209                   | 3.91E-02                                 |
| <i>EatA</i>                   | 0.526315789                         | 0.042857143    | 2.82E-10                      | 1.49E-08                                 |
| <i>CS6 fimbrial subunit B</i> | 0.49122807                          | 0.028571429    | 3.17E-10                      | 1.26E-08                                 |

|                                         |             |             |             |          |
|-----------------------------------------|-------------|-------------|-------------|----------|
| <i>CS6 fimbrial subunit A</i>           | 0.368421053 | 0.014285714 | 6.16E-08    | 1.96E-06 |
| <i>Heat labile enterotoxin.LT.</i>      | 0.631578947 | 0.214285714 | 2.03E-06    | 5.38E-05 |
| <i>iha</i>                              | 0.01754386  | 0.171428571 | 0.006053549 | 5.07E-02 |
| <i>kpsT</i>                             | 0           | 0.085714286 | 0.032383817 | 2.57E-01 |
| <i>aatB</i>                             | 0.210526316 | 0.071428571 | 0.03420108  | 2.59E-01 |
| <i>iucA</i>                             | 0.035087719 | 0.142857143 | 0.064064367 | 4.63E-01 |
| <i>iutA</i>                             | 0.035087719 | 0.142857143 | 0.064064367 | 4.43E-01 |
| <i>chuA</i>                             | 0.210526316 | 0.085714286 | 0.071389697 | 4.73E-01 |
| <i>iucD</i>                             | 0.052631579 | 0.157142857 | 0.087016481 | 5.53E-01 |
| <i>agn43</i>                            | 0.385964912 | 0.242857143 | 0.121263444 | 7.42E-01 |
| <i>papI</i>                             | 0           | 0.057142857 | 0.126942681 | 7.48E-01 |
| <i>sfaC</i>                             | 0           | 0.057142857 | 0.126942681 | 7.21E-01 |
| <i>iucC</i>                             | 0.052631579 | 0.142857143 | 0.141030897 | 7.73E-01 |
| <i>traT</i>                             | 0.771929825 | 0.657142857 | 0.174227221 | 9.23E-01 |
| <i>chuT</i>                             | 0.175438596 | 0.085714286 | 0.179261033 | 9.19E-01 |
| <i>cvaC</i>                             | 0.035087719 | 0.114285714 | 0.183175735 | 9.10E-01 |
| <i>chuY</i>                             | 0.035087719 | 0.1         | 0.185050739 | 8.92E-01 |
| <i>CsfA</i>                             | 0.035087719 | 0           | 0.199475066 | 9.33E-01 |
| <i>Dispersin</i>                        | 0.035087719 | 0           | 0.199475066 | 9.06E-01 |
| <i>TibA</i>                             | 0.035087719 | 0           | 0.199475066 | 8.81E-01 |
| <i>aggregative adherence fimbriae I</i> | 0.035087719 | 0           | 0.199475066 | 8.57E-01 |
| <i>pic</i>                              | 0.035087719 | 0           | 0.199475066 | 8.13E-01 |
| <i>sat</i>                              | 0.035087719 | 0           | 0.199475066 | 7.93E-01 |
| <i>chuU</i>                             | 0.192982456 | 0.1         | 0.200242025 | 7.77E-01 |
| <i>aatA</i>                             | 0.052631579 | 0.128571429 | 0.223026882 | 8.44E-01 |
| <i>aufG</i>                             | 0           | 0.042857143 | 0.251968504 | 9.32E-01 |

|              |             |             |             |          |
|--------------|-------------|-------------|-------------|----------|
| <i>papC</i>  | 0           | 0.042857143 | 0.251968504 | 9.11E-01 |
| <i>papF</i>  | 0           | 0.042857143 | 0.251968504 | 8.90E-01 |
| <i>papH</i>  | 0           | 0.042857143 | 0.251968504 | 8.71E-01 |
| <i>papJ</i>  | 0           | 0.042857143 | 0.251968504 | 8.52E-01 |
| <i>pgtP</i>  | 0           | 0.042857143 | 0.251968504 | 8.35E-01 |
| <i>prfC</i>  | 0           | 0.042857143 | 0.251968504 | 8.18E-01 |
| <i>prfG</i>  | 0           | 0.042857143 | 0.251968504 | 8.01E-01 |
| <i>prfH</i>  | 0           | 0.042857143 | 0.251968504 | 7.86E-01 |
| <i>kpsS</i>  | 0.070175439 | 0.142857143 | 0.258491722 | 7.90E-01 |
| <i>chuS</i>  | 0.157894737 | 0.085714286 | 0.271696071 | 8.15E-01 |
| <i>chuW</i>  | 0.157894737 | 0.085714286 | 0.271696071 | 8.00E-01 |
| <i>aslA</i>  | 0.50877193  | 0.614285714 | 0.281043083 | 8.12E-01 |
| <i>iucB</i>  | 0.087719298 | 0.157142857 | 0.290191226 | 8.24E-01 |
| <i>ompTp</i> | 0.035087719 | 0.085714286 | 0.294571029 | 8.22E-01 |
| <i>traJ</i>  | 0.210526316 | 0.3         | 0.310821629 | 8.52E-01 |
| <i>ecpC</i>  | 0.947368421 | 0.885714286 | 0.34284461  | 9.24E-01 |
| <i>hylF</i>  | 0.052631579 | 0.114285714 | 0.34284461  | 9.09E-01 |
| <i>kpsC</i>  | 0.105263158 | 0.157142857 | 0.442564814 | 1.15E+00 |
| <i>aggR</i>  | 0.01754386  | 0           | 0.448818898 | 1.15E+00 |
| <i>aufA</i>  | 0.01754386  | 0           | 0.448818898 | 1.13E+00 |
| <i>aufB</i>  | 0.01754386  | 0           | 0.448818898 | 1.12E+00 |
| <i>aufD</i>  | 0.01754386  | 0           | 0.448818898 | 1.10E+00 |
| <i>aufE</i>  | 0.01754386  | 0           | 0.448818898 | 1.08E+00 |
| <i>ireA</i>  | 0.01754386  | 0           | 0.448818898 | 1.07E+00 |
| <i>neuB</i>  | 0.01754386  | 0           | 0.448818898 | 1.05E+00 |
| <i>neuC</i>  | 0.01754386  | 0           | 0.448818898 | 1.03E+00 |

|                             |             |             |             |          |
|-----------------------------|-------------|-------------|-------------|----------|
| <i>tosA</i>                 | 0.01754386  | 0           | 0.448818898 | 1.02E+00 |
| <i>tsh</i>                  | 0.01754386  | 0           | 0.448818898 | 1.01E+00 |
| <i>vat</i>                  | 0.01754386  | 0           | 0.448818898 | 9.91E-01 |
| <i>iroB</i>                 | 0.035087719 | 0.071428571 | 0.457775979 | 9.97E-01 |
| <i>iroC</i>                 | 0.035087719 | 0.071428571 | 0.457775979 | 9.84E-01 |
| <i>iroN</i>                 | 0.035087719 | 0.071428571 | 0.457775979 | 9.70E-01 |
| <i>fimF</i>                 | 0.824561404 | 0.871428571 | 0.467422027 | 9.78E-01 |
| <i>fimE</i>                 | 0.789473684 | 0.842857143 | 0.491717043 | 1.02E+00 |
| <i>afaE</i>                 | 0           | 0.028571429 | 0.501312336 | 1.02E+00 |
| <i>bmaE</i>                 | 0           | 0.028571429 | 0.501312336 | 1.01E+00 |
| <i>sfaB</i>                 | 0           | 0.028571429 | 0.501312336 | 9.84E-01 |
| <i>fimI</i>                 | 0.771929825 | 0.828571429 | 0.503077827 | 9.75E-01 |
| <i>kpsE</i>                 | 0.228070175 | 0.171428571 | 0.503077827 | 9.64E-01 |
| <i>chuX</i>                 | 0.052631579 | 0.1         | 0.510009245 | 9.65E-01 |
| <i>ecpA</i>                 | 0.947368421 | 0.9         | 0.510009245 | 9.54E-01 |
| <i>ecpB</i>                 | 0.947368421 | 0.9         | 0.510009245 | 9.43E-01 |
| <i>ecpD</i>                 | 0.947368421 | 0.9         | 0.510009245 | 9.32E-01 |
| <i>ecpE</i>                 | 0.947368421 | 0.914285714 | 0.513611609 | 9.28E-01 |
| <i>ecpR</i>                 | 0.929824561 | 0.885714286 | 0.545275319 | 9.74E-01 |
| <i>CS5 fimbrial subunit</i> | 0.035087719 | 0.014285714 | 0.587086614 | 1.04E+00 |
| <i>papD</i>                 | 0.01754386  | 0.042857143 | 0.627045974 | 1.08E+00 |
| <i>papK</i>                 | 0.01754386  | 0.042857143 | 0.627045974 | 1.07E+00 |
| <i>kpsF</i>                 | 0.210526316 | 0.171428571 | 0.651185513 | 1.10E+00 |
| <i>papB</i>                 | 0.035087719 | 0.057142857 | 0.690157702 | 1.16E+00 |
| <i>tia</i>                  | 0.035087719 | 0.057142857 | 0.690157702 | 1.14E+00 |
| <i>cvaA</i>                 | 0.052631579 | 0.071428571 | 0.729784227 | 1.20E+00 |

|                   |             |             |             |          |
|-------------------|-------------|-------------|-------------|----------|
| <i>iroD</i>       | 0.052631579 | 0.071428571 | 0.729784227 | 1.18E+00 |
| <i>iroE</i>       | 0.052631579 | 0.071428571 | 0.729784227 | 1.17E+00 |
| <i>IpaH</i>       | 0.105263158 | 0.085714286 | 0.766558453 | 1.22E+00 |
| <i>kpsM</i>       | 0.105263158 | 0.085714286 | 0.766558453 | 1.21E+00 |
| <i>fimG</i>       | 0.894736842 | 0.871428571 | 0.786088341 | 1.23E+00 |
| <i>fimH</i>       | 0.894736842 | 0.871428571 | 0.786088341 | 1.21E+00 |
| <i>ybtE</i>       | 0.157894737 | 0.142857143 | 0.808756413 | 1.24E+00 |
| <i>ybtQ</i>       | 0.157894737 | 0.142857143 | 0.808756413 | 1.22E+00 |
| <i>ybtU</i>       | 0.157894737 | 0.142857143 | 0.808756413 | 1.21E+00 |
| <i>ybtX</i>       | 0.157894737 | 0.142857143 | 0.808756413 | 1.20E+00 |
| <i>kpsD</i>       | 0.192982456 | 0.171428571 | 0.818851724 | 1.21E+00 |
| <i>kpsU</i>       | 0.192982456 | 0.171428571 | 0.818851724 | 1.19E+00 |
| <i>aidA</i>       | 0.228070175 | 0.2         | 0.827870303 | 1.20E+00 |
| <i>stx</i>        | 0.140350877 | 0.171428571 | 0.8071      | 1.00E+00 |
| <i>Cnf2</i>       | 0           | 0           | 1           | 1.43E+00 |
| <i>CotA</i>       | 0.01754386  | 0.014285714 | 1           | 1.42E+00 |
| <i>CotB</i>       | 0.01754386  | 0.014285714 | 1           | 1.41E+00 |
| <i>CotC</i>       | 0.01754386  | 0.014285714 | 1           | 1.39E+00 |
| <i>CotD</i>       | 0.01754386  | 0.014285714 | 1           | 1.38E+00 |
| <i>fliC.</i>      | 0.035087719 | 0.042857143 | 1           | 1.37E+00 |
| <i>S fimbriae</i> | 0           | 0.014285714 | 1           | 1.36E+00 |
| <i>astA</i>       | 0.385964912 | 0.4         | 1           | 1.35E+00 |
| <i>clpG</i>       | 0           | 0           | 1           | 1.34E+00 |
| <i>cnfI</i>       | 0           | 0           | 1           | 1.33E+00 |
| <i>espP</i>       | 0           | 0.014285714 | 1           | 1.30E+00 |
| <i>etsC</i>       | 0.035087719 | 0.028571429 | 1           | 1.29E+00 |

|                                        |             |             |   |          |
|----------------------------------------|-------------|-------------|---|----------|
| <i>fliCH7</i>                          | 0.035087719 | 0.042857143 | 1 | 1.26E+00 |
| <i>fliP</i>                            | 0.98245614  | 0.971428571 | 1 | 1.25E+00 |
| <i>focC</i>                            | 0           | 0.014285714 | 1 | 1.24E+00 |
| <i>focD</i>                            | 0           | 0.014285714 | 1 | 1.23E+00 |
| <i>focF</i>                            | 0           | 0.014285714 | 1 | 1.22E+00 |
| <i>focH</i>                            | 0           | 0.014285714 | 1 | 1.21E+00 |
| <i>focI</i>                            | 0           | 0.014285714 | 1 | 1.20E+00 |
| <i>fuyA</i>                            | 0.140350877 | 0.142857143 | 1 | 1.20E+00 |
| <i>fyuA</i>                            | 0.140350877 | 0.142857143 | 1 | 1.19E+00 |
| <i>gafD</i>                            | 0           | 0           | 1 | 1.18E+00 |
| <i>hlyA</i>                            | 0           | 0.014285714 | 1 | 1.17E+00 |
| <i>hlyB</i>                            | 0           | 0.014285714 | 1 | 1.16E+00 |
| <i>hlyD</i>                            | 0           | 0.014285714 | 1 | 1.15E+00 |
| <i>irp1</i>                            | 0.140350877 | 0.142857143 | 1 | 1.14E+00 |
| <i>irp2</i>                            | 0.140350877 | 0.142857143 | 1 | 1.14E+00 |
| <i>iss</i>                             | 0.438596491 | 0.442857143 | 1 | 1.13E+00 |
| <i>ompT</i>                            | 0.263157895 | 0.257142857 | 1 | 1.11E+00 |
| <i>papE</i>                            | 0           | 0.014285714 | 1 | 1.10E+00 |
| <i>papG</i>                            | 0           | 0           | 1 | 1.10E+00 |
| <i>papX</i>                            | 0.070175439 | 0.071428571 | 1 | 1.09E+00 |
| <i>putative CS3 fimbrial subunit A</i> | 0           | 0           | 1 | 1.08E+00 |
| <i>rfc</i>                             | 0           | 0.014285714 | 1 | 1.07E+00 |
| <i>sfaD</i>                            | 0           | 0.014285714 | 1 | 1.07E+00 |
| <i>sfaE</i>                            | 0           | 0.014285714 | 1 | 1.06E+00 |
| <i>sfaF</i>                            | 0           | 0.014285714 | 1 | 1.05E+00 |



|             |             |             |   |          |
|-------------|-------------|-------------|---|----------|
| <i>sfaG</i> | 0           | 0.014285714 | 1 | 1.05E+00 |
| <i>sfaH</i> | 0           | 0.014285714 | 1 | 1.04E+00 |
| <i>sitB</i> | 0           | 0           | 1 | 1.03E+00 |
| <i>ybtA</i> | 0.140350877 | 0.142857143 | 1 | 1.03E+00 |
| <i>ybtP</i> | 0.140350877 | 0.142857143 | 1 | 1.02E+00 |
| <i>ybtS</i> | 0.140350877 | 0.142857143 | 1 | 1.01E+00 |
| <i>ybtT</i> | 0.140350877 | 0.142857143 | 1 | 1.01E+00 |
| <i>yfcQ</i> | 0           | 0.014285714 | 1 | 1.00E+00 |

---

**Table S3 Putative VFs in MG1655**

| VFs          |
|--------------|
| <i>Hcp</i>   |
| <i>agn43</i> |
| <i>aslA</i>  |
| <i>cadA</i>  |
| <i>cnf1</i>  |
| <i>CsgC</i>  |
| <i>dsdA</i>  |
| <i>ecpA</i>  |
| <i>ecpB</i>  |
| <i>ecpC</i>  |
| <i>ecpD</i>  |
| <i>ecpE</i>  |
| <i>ecpR</i>  |
| <i>feoB</i>  |
| <i>fepA</i>  |
| <i>fimA</i>  |
| <i>fimE</i>  |
| <i>fimF</i>  |
| <i>fimG</i>  |
| <i>fimH</i>  |
| <i>fimI</i>  |

*fliP*  
*guaA*  
*malX*  
*ompT*  
*rfc*  
*yadN*

---

**Table S4 Average Putative VFs numbers of each strain type**

| <b>Strain</b> | <b>Putative VFs numbers</b> |
|---------------|-----------------------------|
| swine9        | 31                          |
| swine8        | 25                          |
| swine72       | 30                          |
| swine71       | 44                          |
| swine70       | 51                          |
| swine7        | 28                          |
| swine68       | 31                          |
| swine67       | 41                          |
| swine66       | 27                          |
| swine65       | 63                          |
| swine64       | 67                          |
| swine63       | 43                          |
| swine62       | 25                          |
| swine61       | 22                          |
| swine60       | 21                          |
| swine6        | 66                          |
| swine59       | 26                          |
| swine58       | 35                          |
| swine57       | 31                          |
| swine56       | 29                          |
| swine55       | 46                          |

|         |    |
|---------|----|
| swine54 | 41 |
| swine53 | 43 |
| swine52 | 24 |
| swine51 | 22 |
| swine50 | 46 |
| swine5  | 47 |
| swine49 | 22 |
| swine48 | 26 |
| swine47 | 27 |
| swine46 | 29 |
| swine45 | 33 |
| swine44 | 53 |
| swine43 | 27 |
| swine42 | 71 |
| swine41 | 26 |
| swine40 | 24 |
| swine4  | 38 |
| swine39 | 32 |
| swine38 | 18 |
| swine37 | 19 |
| swine36 | 16 |
| swine35 | 27 |
| swine34 | 19 |
| swine33 | 43 |
| swine32 | 27 |
| swine31 | 26 |

|                                              |           |
|----------------------------------------------|-----------|
| swine30                                      | 28        |
| swine3                                       | 25        |
| swine29                                      | 24        |
| swine28                                      | 22        |
| swine27                                      | 47        |
| swine26                                      | 32        |
| swine25                                      | 30        |
| swine24                                      | 30        |
| swine23                                      | 31        |
| swine22                                      | 37        |
| swine21                                      | 25        |
| swine20                                      | 24        |
| swine2                                       | 26        |
| swine19                                      | 36        |
| swine18                                      | 25        |
| swine16                                      | 28        |
| swine15                                      | 29        |
| swine14                                      | 27        |
| swine13                                      | 51        |
| swine12                                      | 43        |
| swine11                                      | 31        |
| swine10                                      | 31        |
| swine1                                       | 27        |
| <b>Average VFs numbers in swine isolates</b> | <b>33</b> |
| sheep9                                       | 30        |

|         |    |
|---------|----|
| sheep8  | 22 |
| sheep7  | 33 |
| sheep6  | 24 |
| sheep57 | 29 |
| sheep56 | 39 |
| sheep55 | 42 |
| sheep54 | 26 |
| sheep53 | 36 |
| sheep52 | 30 |
| sheep51 | 31 |
| sheep50 | 19 |
| sheep5  | 25 |
| sheep49 | 26 |
| sheep48 | 25 |
| sheep47 | 38 |
| sheep46 | 25 |
| sheep45 | 20 |
| sheep44 | 25 |
| sheep43 | 25 |
| sheep42 | 25 |
| sheep41 | 35 |
| sheep40 | 22 |
| sheep4  | 25 |
| sheep39 | 25 |
| sheep38 | 25 |
| sheep37 | 29 |

|         |    |
|---------|----|
| sheep36 | 32 |
| sheep35 | 29 |
| sheep34 | 29 |
| sheep33 | 53 |
| sheep32 | 27 |
| sheep31 | 38 |
| sheep30 | 27 |
| sheep3  | 22 |
| sheep29 | 55 |
| sheep28 | 40 |
| sheep27 | 32 |
| sheep26 | 33 |
| sheep25 | 26 |
| sheep24 | 33 |
| sheep23 | 31 |
| sheep22 | 27 |
| sheep21 | 24 |
| sheep20 | 30 |
| sheep2  | 22 |
| sheep19 | 59 |
| sheep18 | 28 |
| sheep17 | 32 |
| sheep16 | 36 |
| sheep15 | 20 |
| sheep14 | 38 |
| sheep13 | 47 |



|                                                  |           |
|--------------------------------------------------|-----------|
| sheep12                                          | 27        |
| sheep11                                          | 26        |
| sheep10                                          | 24        |
| sheep1                                           | 22        |
| <b>Average VFs numbers in sheep<br/>isolates</b> | <b>30</b> |

---

**Table S5 Percentage of Putative VFs in EAEC strains**

| Virulence factors             | Proportion of putative VF in distinct groups |                | P value<br>(Fisher's exact test) | Adjusted P value<br>(Bonferroni correction) |
|-------------------------------|----------------------------------------------|----------------|----------------------------------|---------------------------------------------|
|                               | sheep isolates                               | swine isolates | swine-sheep                      | swine-sheep                                 |
| <i>csgA</i>                   | 0.105263158                                  | 0.872340426    | 2.67E-11                         | 4.24E-09                                    |
| <i>LT</i>                     | 0.578947368                                  | 0.085106383    | 9.54E-07                         | 0.00015167                                  |
| <i>CS6 fimbrial subunit B</i> | 0.473684211                                  | 0.042553191    | 3.40E-06                         | 0.00054084                                  |
| <i>EatA</i>                   | 0.473684211                                  | 0.063829787    | 2.23E-05                         | 0.003541151                                 |
| <i>CS6 fimbrial subunit A</i> | 0.342105263                                  | 0.021276596    | 6.95E-05                         | 0.011054856                                 |
| <i>CS1</i>                    | 0.052631579                                  | 0.404255319    | 0.000135081                      | 0.021477848                                 |
| <i>fimA</i>                   | 0.078947368                                  | 0.765957447    | 1.31E-10                         | 2.09E-08                                    |
| <i>aatB</i>                   | 0.289473684                                  | 0.042553191    | 0.002130665                      | 0.338775713                                 |
| <i>yadN</i>                   | 0.578947368                                  | 0.872340426    | 0.002814001                      | 0.447426123                                 |
| <i>hek</i>                    | 0                                            | 0.191489362    | 0.003705471                      | 0.589169911                                 |
| <i>hra</i>                    | 0                                            | 0.191489362    | 0.003705471                      | 0.589169911                                 |
| <i>CS5 fimbrial subunit</i>   | 0                                            | 0.021276596    | 1                                | 1                                           |
| <i>Cnf2</i>                   | 0                                            | 0              | 1                                | 1                                           |
| <i>CotA</i>                   | 0.026315789                                  | 0.021276596    | 1                                | 1                                           |
| <i>CotB</i>                   | 0.026315789                                  | 0.021276596    | 1                                | 1                                           |
| <i>CotC</i>                   | 0.026315789                                  | 0.021276596    | 1                                | 1                                           |
| <i>CotD</i>                   | 0.026315789                                  | 0.021276596    | 1                                | 1                                           |

|                                         |             |             |             |   |
|-----------------------------------------|-------------|-------------|-------------|---|
| <i>CsfA</i>                             | 0           | 0           | 1           | 1 |
| <i>Dispersin</i>                        | 0.026315789 | 0           | 0.447058824 | 1 |
| <i>fliC</i>                             | 0.026315789 | 0.042553191 | 1           | 1 |
| <i>Hcp</i>                              | 0.947368421 | 0.978723404 | 0.584104485 | 1 |
| <i>IpaH</i>                             | 0.131578947 | 0.063829787 | 0.457525466 | 1 |
| <i>S fimbriae</i>                       | 0           | 0.021276596 | 1           | 1 |
| <i>SepA</i>                             | 0           | 0.042553191 | 0.499719888 | 1 |
| <i>TibA</i>                             | 0           | 0           | 1           | 1 |
| <i>Urease beta subunit</i>              | 0           | 0.042553191 | 0.499719888 | 1 |
| <i>aatA</i>                             | 0.078947368 | 0.127659574 | 0.724996536 | 1 |
| <i>afaE</i>                             | 0           | 0           | 1           | 1 |
| <i>aggR</i>                             | 0.026315789 | 0           | 0.447058824 | 1 |
| <i>aggregative adherence fimbriae I</i> | 0.026315789 | 0           | 0.447058824 | 1 |
| <i>agn43</i>                            | 0.289473684 | 0.255319149 | 0.807944323 | 1 |
| <i>aidA</i>                             | 0.210526316 | 0.29787234  | 0.457411955 | 1 |
| <i>aslA</i>                             | 0.578947368 | 0.489361702 | 0.51294572  | 1 |
| <i>astA</i>                             | 0.394736842 | 0.319148936 | 0.500910217 | 1 |
| <i>aufA</i>                             | 0.026315789 | 0           | 0.447058824 | 1 |
| <i>aufB</i>                             | 0.026315789 | 0           | 0.447058824 | 1 |
| <i>aufD</i>                             | 0.026315789 | 0           | 0.447058824 | 1 |
| <i>aufE</i>                             | 0.026315789 | 0           | 0.447058824 | 1 |
| <i>aufG</i>                             | 0           | 0           | 1           | 1 |
| <i>bmaE</i>                             | 0           | 0           | 1           | 1 |
| <i>cadA</i>                             | 0.789473684 | 0.978723404 | 0.0092879   | 1 |
| <i>chuA</i>                             | 0.236842105 | 0.063829787 | 0.029852646 | 1 |
| <i>chuS</i>                             | 0.210526316 | 0.063829787 | 0.056563387 | 1 |

|             |             |             |             |   |
|-------------|-------------|-------------|-------------|---|
| <i>chuT</i> | 0.210526316 | 0.063829787 | 0.056563387 | 1 |
| <i>chuU</i> | 0.236842105 | 0.063829787 | 0.029852646 | 1 |
| <i>chuW</i> | 0.210526316 | 0.063829787 | 0.056563387 | 1 |
| <i>chuX</i> | 0.078947368 | 0.063829787 | 1           | 1 |
| <i>chuY</i> | 0.026315789 | 0.063829787 | 0.624679657 | 1 |
| <i>clpG</i> | 0           | 0           | 1           | 1 |
| <i>cnfI</i> | 0           | 0           | 1           | 1 |
| <i>CsgC</i> | 1           | 0.978723404 | 1           | 1 |
| <i>cvaA</i> | 0.078947368 | 0.085106383 | 1           | 1 |
| <i>cvaC</i> | 0.052631579 | 0.127659574 | 0.288401888 | 1 |
| <i>dsdA</i> | 1           | 0.957446809 | 0.499719888 | 1 |
| <i>ecpA</i> | 0.973684211 | 0.85106383  | 0.069536082 | 1 |
| <i>ecpB</i> | 0.973684211 | 0.85106383  | 0.069536082 | 1 |
| <i>ecpC</i> | 0.973684211 | 0.829787234 | 0.038310144 | 1 |
| <i>ecpD</i> | 0.973684211 | 0.85106383  | 0.069536082 | 1 |
| <i>ecpE</i> | 0.973684211 | 0.872340426 | 0.124252534 | 1 |
| <i>ecpR</i> | 0.947368421 | 0.829787234 | 0.173739373 | 1 |
| <i>espP</i> | 0           | 0           | 1           | 1 |
| <i>etsC</i> | 0.052631579 | 0.042553191 | 1           | 1 |
| <i>feoB</i> | 1           | 0.978723404 | 1           | 1 |
| <i>fepA</i> | 1           | 1           | 1           | 1 |
| <i>fimE</i> | 0.815789474 | 0.829787234 | 1           | 1 |
| <i>fimF</i> | 0.894736842 | 0.914893617 | 1           | 1 |
| <i>fimG</i> | 0.921052632 | 0.914893617 | 1           | 1 |
| <i>fimH</i> | 0.921052632 | 0.914893617 | 1           | 1 |
| <i>fimI</i> | 0.815789474 | 0.829787234 | 1           | 1 |

|                |             |             |             |   |
|----------------|-------------|-------------|-------------|---|
| <i>fliCH7</i>  | 0.026315789 | 0.042553191 | 1           | 1 |
| <i>fliP</i>    | 0.973684211 | 0.957446809 | 1           | 1 |
| <i>focC</i>    | 0           | 0.021276596 | 1           | 1 |
| <i>focD</i>    | 0           | 0.021276596 | 1           | 1 |
| <i>focF</i>    | 0           | 0.021276596 | 1           | 1 |
| <i>focH</i>    | 0           | 0.021276596 | 1           | 1 |
| <i>focI</i>    | 0           | 0.021276596 | 1           | 1 |
| <i>fuyA</i>    | 0.184210526 | 0.170212766 | 1           | 1 |
| <i>fyuA</i>    | 0.184210526 | 0.170212766 | 1           | 1 |
| <i>gafD</i>    | 0           | 0           | 1           | 1 |
| <i>guaA</i>    | 0.947368421 | 1           | 0.196918768 | 1 |
| <i>STb/ST2</i> | 0           | 0.063829787 | 0.249579832 | 1 |
| <i>hlyA</i>    | 0           | 0.021276596 | 1           | 1 |
| <i>hlyB</i>    | 0           | 0.021276596 | 1           | 1 |
| <i>hlyC</i>    | 0           | 0.021276596 | 1           | 1 |
| <i>hlyD</i>    | 0           | 0.021276596 | 1           | 1 |
| <i>hylF</i>    | 0.052631579 | 0.14893617  | 0.178826865 | 1 |
| <i>iha</i>     | 0.026315789 | 0.042553191 | 1           | 1 |
| <i>ireA</i>    | 0.026315789 | 0           | 0.447058824 | 1 |
| <i>iroB</i>    | 0.052631579 | 0.106382979 | 0.452657834 | 1 |
| <i>iroC</i>    | 0.052631579 | 0.106382979 | 0.452657834 | 1 |
| <i>iroD</i>    | 0.078947368 | 0.106382979 | 0.726417742 | 1 |
| <i>iroE</i>    | 0.078947368 | 0.106382979 | 0.726417742 | 1 |
| <i>iroN</i>    | 0.052631579 | 0.106382979 | 0.452657834 | 1 |
| <i>irp1</i>    | 0.184210526 | 0.170212766 | 1           | 1 |
| <i>irp2</i>    | 0.184210526 | 0.170212766 | 1           | 1 |

|              |             |             |             |   |
|--------------|-------------|-------------|-------------|---|
| <i>iss</i>   | 0.473684211 | 0.446808511 | 0.829895738 | 1 |
| <i>iucA</i>  | 0.052631579 | 0.170212766 | 0.173739373 | 1 |
| <i>iucB</i>  | 0.105263158 | 0.170212766 | 0.534755163 | 1 |
| <i>iucC</i>  | 0.078947368 | 0.170212766 | 0.331307366 | 1 |
| <i>iucD</i>  | 0.078947368 | 0.170212766 | 0.331307366 | 1 |
| <i>iutA</i>  | 0.052631579 | 0.170212766 | 0.173739373 | 1 |
| <i>kpsC</i>  | 0.052631579 | 0.085106383 | 0.687233048 | 1 |
| <i>kpsD</i>  | 0.157894737 | 0.106382979 | 0.529792322 | 1 |
| <i>kpsE</i>  | 0.210526316 | 0.106382979 | 0.231784109 | 1 |
| <i>kpsF</i>  | 0.184210526 | 0.106382979 | 0.358330466 | 1 |
| <i>kpsM</i>  | 0.078947368 | 0.063829787 | 1           | 1 |
| <i>kpsS</i>  | 0           | 0.063829787 | 0.249579832 | 1 |
| <i>kpsT</i>  | 0           | 0.042553191 | 0.499719888 | 1 |
| <i>kpsU</i>  | 0.157894737 | 0.106382979 | 0.529792322 | 1 |
| <i>malX</i>  | 1           | 1           | 1           | 1 |
| <i>neuB</i>  | 0           | 0           | 1           | 1 |
| <i>neuC</i>  | 0           | 0           | 1           | 1 |
| <i>ompT</i>  | 0.263157895 | 0.276595745 | 1           | 1 |
| <i>ompTp</i> | 0.052631579 | 0.127659574 | 0.288401888 | 1 |
| <i>paa</i>   | 0.026315789 | 0.127659574 | 0.124252534 | 1 |
| <i>papB</i>  | 0.026315789 | 0.085106383 | 0.374466096 | 1 |
| <i>papC</i>  | 0           | 0.063829787 | 0.249579832 | 1 |
| <i>papD</i>  | 0           | 0.063829787 | 0.249579832 | 1 |
| <i>papE</i>  | 0           | 0.021276596 | 1           | 1 |
| <i>papF</i>  | 0           | 0.063829787 | 0.249579832 | 1 |
| <i>papG</i>  | 0           | 0           | 1           | 1 |

|                                        |             |             |             |   |
|----------------------------------------|-------------|-------------|-------------|---|
| <i>papH</i>                            | 0           | 0.063829787 | 0.249579832 | 1 |
| <i>papI</i>                            | 0           | 0.085106383 | 0.124546557 | 1 |
| <i>papJ</i>                            | 0           | 0.063829787 | 0.249579832 | 1 |
| <i>papK</i>                            | 0           | 0.063829787 | 0.249579832 | 1 |
| <i>papX</i>                            | 0.078947368 | 0.085106383 | 1           | 1 |
| <i>pgtP</i>                            | 0           | 0.063829787 | 0.249579832 | 1 |
| <i>pic</i>                             | 0.052631579 | 0           | 0.196918768 | 1 |
| <i>prfC</i>                            | 0           | 0.063829787 | 0.249579832 | 1 |
| <i>prfG</i>                            | 0           | 0.063829787 | 0.249579832 | 1 |
| <i>prfH</i>                            | 0           | 0.063829787 | 0.249579832 | 1 |
| <i>putative CS3 fimbrial subunit A</i> | 0           | 0           | 1           | 1 |
| <i>rfc</i>                             | 0           | 0.021276596 | 1           | 1 |
| <i>sat</i>                             | 0.026315789 | 0           | 0.447058824 | 1 |
| <i>sfaB</i>                            | 0           | 0.042553191 | 0.499719888 | 1 |
| <i>sfaC</i>                            | 0           | 0.085106383 | 0.124546557 | 1 |
| <i>sfaD</i>                            | 0           | 0.021276596 | 1           | 1 |
| <i>sfaE</i>                            | 0           | 0.021276596 | 1           | 1 |
| <i>sfaF</i>                            | 0           | 0.021276596 | 1           | 1 |
| <i>sfaG</i>                            | 0           | 0.021276596 | 1           | 1 |
| <i>sfaH</i>                            | 0           | 0.021276596 | 1           | 1 |
| <i>sitB</i>                            | 0           | 0           | 1           | 1 |
| <i>stx2A</i>                           | 0           | 0           | 1           | 1 |
| <i>stx2B</i>                           | 0           | 0           | 1           | 1 |
| <i>tia</i>                             | 0.026315789 | 0.042553191 | 1           | 1 |
| <i>tosA</i>                            | 0.026315789 | 0           | 0.447058824 | 1 |
| <i>traJ</i>                            | 0.236842105 | 0.340425532 | 0.344720649 | 1 |

|             |             |             |             |   |
|-------------|-------------|-------------|-------------|---|
| <i>traT</i> | 0.736842105 | 0.638297872 | 0.359093818 | 1 |
| <i>tsh</i>  | 0.026315789 | 0           | 0.447058824 | 1 |
| <i>vat</i>  | 0.026315789 | 0           | 0.447058824 | 1 |
| <i>ybtA</i> | 0.184210526 | 0.170212766 | 1           | 1 |
| <i>ybtE</i> | 0.184210526 | 0.170212766 | 1           | 1 |
| <i>ybtP</i> | 0.184210526 | 0.170212766 | 1           | 1 |
| <i>ybtQ</i> | 0.184210526 | 0.170212766 | 1           | 1 |
| <i>ybtS</i> | 0.184210526 | 0.170212766 | 1           | 1 |
| <i>ybtT</i> | 0.184210526 | 0.170212766 | 1           | 1 |
| <i>ybtU</i> | 0.184210526 | 0.170212766 | 1           | 1 |
| <i>ybtX</i> | 0.184210526 | 0.170212766 | 1           | 1 |
| <i>yfcQ</i> | 0           | 0.021276596 | 1           | 1 |

---



**Table S6 Percentage of VFs in STEC strains**

| Virulence factors             | Proportion of VF in distinct groups |                | P value<br>(Fisher's exact test) | Adjusted P value<br>(Bonferroni correction) |
|-------------------------------|-------------------------------------|----------------|----------------------------------|---------------------------------------------|
|                               | sheep isolates                      | swine isolates | swine-sheep                      | swine-sheep                                 |
| <i>csgA</i>                   | 0                                   | 1              | 4.91E-06                         | 0.000781365                                 |
| <i>fimA</i>                   | 0                                   | 0.846153846    | 0.000221141                      | 0.035161433                                 |
| <i>stx2B</i>                  | 0                                   | 0.769230769    | 0.001031992                      | 0.164086687                                 |
| <i>CS6 fimbrial subunit B</i> | 0.625                               | 0              | 0.002751978                      | 0.437564499                                 |
| <i>EatA</i>                   | 0.625                               | 0              | 0.002751978                      | 0.437564499                                 |
| <i>aslA</i>                   | 0.375                               | 1              | 0.002751978                      | 0.437564499                                 |
| <i>stx2A</i>                  | 0                                   | 0.692307692    | 0.004599735                      | 0.731357806                                 |
| <i>CS1</i>                    | 0                                   | 0.076923077    | 1                                | 1                                           |
| <i>CS5 fimbrial subunit</i>   | 0.125                               | 0              | 0.380952381                      | 1                                           |
| <i>CS6 fimbrial subunit A</i> | 0.5                                 | 0              | 0.011695906                      | 1                                           |
| <i>Cnf2</i>                   | 0                                   | 0              | 1                                | 1                                           |
| <i>CotA</i>                   | 0                                   | 0              | 1                                | 1                                           |
| <i>CotB</i>                   | 0                                   | 0              | 1                                | 1                                           |
| <i>CotC</i>                   | 0                                   | 0              | 1                                | 1                                           |
| <i>CotD</i>                   | 0                                   | 0              | 1                                | 1                                           |
| <i>CsfA</i>                   | 0.125                               | 0              | 0.380952381                      | 1                                           |
| <i>Dispersin</i>              | 0.125                               | 0              | 0.380952381                      | 1                                           |
| <i>fliC</i>                   | 0                                   | 0              | 1                                | 1                                           |
| <i>Hcp</i>                    | 1                                   | 1              | 1                                | 1                                           |

|                              |       |             |             |   |
|------------------------------|-------|-------------|-------------|---|
| <i>LT</i>                    | 0.75  | 0.307692308 | 0.080495356 | 1 |
| <i>IpaH</i>                  | 0     | 0.230769231 | 0.257142857 | 1 |
| <i>S fimbriae</i>            | 0     | 0           | 1           | 1 |
| <i>SepA</i>                  | 0     | 0.384615385 | 0.110717971 | 1 |
| <i>TibA</i>                  | 0     | 0           | 1           | 1 |
| <i>Urease beta subunit</i>   | 0     | 0.461538462 | 0.045555064 | 1 |
| <i>aatA</i>                  | 0     | 0.153846154 | 0.504761905 | 1 |
| <i>aatB</i>                  | 0.125 | 0.230769231 | 1           | 1 |
| <i>afaE</i>                  | 0     | 0           | 1           | 1 |
| <i>aggR</i>                  | 0     | 0           | 1           | 1 |
| <i>aggregative adherence</i> |       |             |             |   |
| <i>fimbriae I</i>            | 0.125 | 0           | 0.380952381 | 1 |
| <i>agn43</i>                 | 0.75  | 0.153846154 | 0.017573345 | 1 |
| <i>aidA</i>                  | 0.125 | 0           | 0.380952381 | 1 |
| <i>astA</i>                  | 0.25  | 0.461538462 | 0.399862401 | 1 |
| <i>aufA</i>                  | 0     | 0           | 1           | 1 |
| <i>aufB</i>                  | 0     | 0           | 1           | 1 |
| <i>aufD</i>                  | 0     | 0           | 1           | 1 |
| <i>aufE</i>                  | 0     | 0           | 1           | 1 |
| <i>aufG</i>                  | 0     | 0.230769231 | 0.257142857 | 1 |
| <i>bmaE</i>                  | 0     | 0           | 1           | 1 |
| <i>cadA</i>                  | 0.75  | 1           | 0.133333333 | 1 |
| <i>chuA</i>                  | 0.125 | 0.230769231 | 1           | 1 |
| <i>chuS</i>                  | 0     | 0.230769231 | 0.257142857 | 1 |
| <i>chuT</i>                  | 0     | 0.230769231 | 0.257142857 | 1 |
| <i>chuU</i>                  | 0.125 | 0.230769231 | 1           | 1 |

|               |       |             |             |   |
|---------------|-------|-------------|-------------|---|
| <i>chuW</i>   | 0     | 0.230769231 | 0.257142857 | 1 |
| <i>chuX</i>   | 0     | 0.307692308 | 0.131161236 | 1 |
| <i>chuY</i>   | 0     | 0.230769231 | 0.257142857 | 1 |
| <i>clpG</i>   | 0     | 0           | 1           | 1 |
| <i>cnfI</i>   | 0     | 0           | 1           | 1 |
| <i>CsgC</i>   | 1     | 1           | 1           | 1 |
| <i>cvaA</i>   | 0     | 0           | 1           | 1 |
| <i>cvaC</i>   | 0     | 0.076923077 | 1           | 1 |
| <i>dsdA</i>   | 1     | 1           | 1           | 1 |
| <i>ecpA</i>   | 0.875 | 1           | 0.380952381 | 1 |
| <i>ecpB</i>   | 0.875 | 1           | 0.380952381 | 1 |
| <i>ecpC</i>   | 0.875 | 1           | 0.380952381 | 1 |
| <i>ecpD</i>   | 0.875 | 1           | 0.380952381 | 1 |
| <i>ecpE</i>   | 0.875 | 1           | 0.380952381 | 1 |
| <i>ecpR</i>   | 0.875 | 1           | 0.380952381 | 1 |
| <i>espP</i>   | 0     | 0           | 1           | 1 |
| <i>etsC</i>   | 0     | 0           | 1           | 1 |
| <i>feoB</i>   | 1     | 1           | 1           | 1 |
| <i>fepA</i>   | 1     | 1           | 1           | 1 |
| <i>fimE</i>   | 0.875 | 0.923076923 | 1           | 1 |
| <i>fimF</i>   | 0.625 | 0.846153846 | 0.325372254 | 1 |
| <i>fimG</i>   | 0.875 | 0.846153846 | 1           | 1 |
| <i>fimH</i>   | 0.875 | 0.846153846 | 1           | 1 |
| <i>fimI</i>   | 0.75  | 0.846153846 | 0.617710944 | 1 |
| <i>fliCH7</i> | 0     | 0           | 1           | 1 |
| <i>fliP</i>   | 1     | 1           | 1           | 1 |

|                |       |             |             |   |
|----------------|-------|-------------|-------------|---|
| <i>focC</i>    | 0     | 0           | 1           | 1 |
| <i>focD</i>    | 0     | 0           | 1           | 1 |
| <i>focF</i>    | 0     | 0           | 1           | 1 |
| <i>focH</i>    | 0     | 0           | 1           | 1 |
| <i>focI</i>    | 0     | 0           | 1           | 1 |
| <i>fuyA</i>    | 0.125 | 0           | 0.380952381 | 1 |
| <i>fyuA</i>    | 0.125 | 0           | 0.380952381 | 1 |
| <i>gafD</i>    | 0     | 0           | 1           | 1 |
| <i>guaA</i>    | 1     | 1           | 1           | 1 |
| <i>STb/ST2</i> | 0     | 0.615384615 | 0.006840631 | 1 |
| <i>hek</i>     | 0     | 0           | 1           | 1 |
| <i>hlyA</i>    | 0     | 0           | 1           | 1 |
| <i>hlyB</i>    | 0     | 0           | 1           | 1 |
| <i>hlyC</i>    | 0     | 0.307692308 | 0.131161236 | 1 |
| <i>hlyD</i>    | 0     | 0           | 1           | 1 |
| <i>hra</i>     | 0     | 0           | 1           | 1 |
| <i>hylF</i>    | 0     | 0           | 1           | 1 |
| <i>iha</i>     | 0     | 0.461538462 | 0.045555064 | 1 |
| <i>ireA</i>    | 0     | 0           | 1           | 1 |
| <i>iroB</i>    | 0     | 0           | 1           | 1 |
| <i>iroC</i>    | 0     | 0           | 1           | 1 |
| <i>iroD</i>    | 0     | 0           | 1           | 1 |
| <i>iroE</i>    | 0     | 0           | 1           | 1 |
| <i>iroN</i>    | 0     | 0           | 1           | 1 |
| <i>irp1</i>    | 0.125 | 0           | 0.380952381 | 1 |
| <i>irp2</i>    | 0.125 | 0           | 0.380952381 | 1 |

|              |       |             |             |   |
|--------------|-------|-------------|-------------|---|
| <i>iss</i>   | 0.375 | 0.307692308 | 1           | 1 |
| <i>iucA</i>  | 0     | 0           | 1           | 1 |
| <i>iucB</i>  | 0.125 | 0.076923077 | 1           | 1 |
| <i>iucC</i>  | 0     | 0           | 1           | 1 |
| <i>iucD</i>  | 0     | 0           | 1           | 1 |
| <i>iutA</i>  | 0     | 0           | 1           | 1 |
| <i>kpsC</i>  | 0.25  | 0.538461538 | 0.366563467 | 1 |
| <i>kpsD</i>  | 0.25  | 0.538461538 | 0.366563467 | 1 |
| <i>kpsE</i>  | 0.25  | 0.538461538 | 0.366563467 | 1 |
| <i>kpsF</i>  | 0.25  | 0.538461538 | 0.366563467 | 1 |
| <i>kpsM</i>  | 0.25  | 0.230769231 | 1           | 1 |
| <i>kpsS</i>  | 0.25  | 0.538461538 | 0.366563467 | 1 |
| <i>kpsT</i>  | 0     | 0.307692308 | 0.131161236 | 1 |
| <i>kpsU</i>  | 0.25  | 0.538461538 | 0.366563467 | 1 |
| <i>malX</i>  | 1     | 1           | 1           | 1 |
| <i>neuB</i>  | 0     | 0           | 1           | 1 |
| <i>neuC</i>  | 0     | 0           | 1           | 1 |
| <i>ompT</i>  | 0.125 | 0.384615385 | 0.335913313 | 1 |
| <i>ompTp</i> | 0     | 0           | 1           | 1 |
| <i>paa</i>   | 0     | 0.538461538 | 0.017956656 | 1 |
| <i>papB</i>  | 0.125 | 0           | 0.380952381 | 1 |
| <i>papC</i>  | 0     | 0           | 1           | 1 |
| <i>papD</i>  | 0.125 | 0           | 0.380952381 | 1 |
| <i>papE</i>  | 0     | 0           | 1           | 1 |
| <i>papF</i>  | 0     | 0           | 1           | 1 |
| <i>papG</i>  | 0     | 0           | 1           | 1 |

|                                      |       |             |             |   |
|--------------------------------------|-------|-------------|-------------|---|
| <i>papH</i>                          | 0     | 0           | 1           | 1 |
| <i>papI</i>                          | 0     | 0           | 1           | 1 |
| <i>papJ</i>                          | 0     | 0           | 1           | 1 |
| <i>papK</i>                          | 0.125 | 0           | 0.380952381 | 1 |
| <i>papX</i>                          | 0.125 | 0           | 0.380952381 | 1 |
| <i>pgtP</i>                          | 0     | 0           | 1           | 1 |
| <i>pic</i>                           | 0     | 0           | 1           | 1 |
| <i>prfC</i>                          | 0     | 0           | 1           | 1 |
| <i>prfG</i>                          | 0     | 0           | 1           | 1 |
| <i>prfH</i>                          | 0     | 0           | 1           | 1 |
| <i>putative CS3 fimbrial subunit</i> |       |             |             |   |
| <i>A</i>                             | 0     | 0           | 1           | 1 |
| <i>rfc</i>                           | 0     | 0           | 1           | 1 |
| <i>sat</i>                           | 0.125 | 0           | 0.380952381 | 1 |
| <i>sfaB</i>                          | 0     | 0           | 1           | 1 |
| <i>sfaC</i>                          | 0     | 0           | 1           | 1 |
| <i>sfaD</i>                          | 0     | 0           | 1           | 1 |
| <i>sfaE</i>                          | 0     | 0           | 1           | 1 |
| <i>sfaF</i>                          | 0     | 0           | 1           | 1 |
| <i>sfaG</i>                          | 0     | 0           | 1           | 1 |
| <i>sfaH</i>                          | 0     | 0           | 1           | 1 |
| <i>sitB</i>                          | 0     | 0           | 1           | 1 |
| <i>tia</i>                           | 0     | 0.076923077 | 1           | 1 |
| <i>tosA</i>                          | 0     | 0           | 1           | 1 |
| <i>traJ</i>                          | 0     | 0.307692308 | 0.131161236 | 1 |
| <i>traT</i>                          | 0.875 | 0.769230769 | 1           | 1 |

|             |       |             |             |   |
|-------------|-------|-------------|-------------|---|
| <i>tsh</i>  | 0     | 0           | 1           | 1 |
| <i>vat</i>  | 0     | 0           | 1           | 1 |
| <i>yadN</i> | 0.875 | 0.769230769 | 1           | 1 |
| <i>ybtA</i> | 0.125 | 0           | 0.380952381 | 1 |
| <i>ybtE</i> | 0.25  | 0           | 0.133333333 | 1 |
| <i>ybtP</i> | 0.125 | 0           | 0.380952381 | 1 |
| <i>ybtQ</i> | 0.25  | 0           | 0.133333333 | 1 |
| <i>ybtS</i> | 0.125 | 0           | 0.380952381 | 1 |
| <i>ybtT</i> | 0.125 | 0           | 0.380952381 | 1 |
| <i>ybtU</i> | 0.25  | 0           | 0.133333333 | 1 |
| <i>ybtX</i> | 0.25  | 0           | 0.133333333 | 1 |
| <i>yfcQ</i> | 0     | 0           | 1           | 1 |

---

**Table S7 Distribution of VFs in O20 and O8 isolates**

| <b>VFs</b>  | <b>Sheep isolates-O20</b> | <b>Swine isolates-O20</b> | <b>Sheep isolates-O8</b> | <b>Swine isolates-O8</b> |
|-------------|---------------------------|---------------------------|--------------------------|--------------------------|
| <i>Hcp</i>  | 1                         |                           | 1                        | 1                        |
| <i>cadA</i> |                           | 1                         |                          | 1                        |
| <i>csgA</i> |                           | 1                         |                          | 1                        |
| <i>CsgC</i> | 1                         | 1                         | 1                        | 1                        |
| <i>dsdA</i> | 1                         | 1                         | 1                        | 1                        |
| <i>ecpA</i> | 1                         |                           | 1                        | 1                        |
| <i>ecpB</i> | 1                         |                           | 1                        | 1                        |
| <i>ecpC</i> | 1                         |                           | 1                        | 1                        |
| <i>ecpD</i> | 1                         |                           | 1                        | 1                        |
| <i>ecpE</i> | 1                         |                           | 1                        | 1                        |
| <i>ecpR</i> | 1                         |                           | 1                        | 1                        |
| <i>feoB</i> | 1                         | 1                         | 1                        | 1                        |
| <i>fepA</i> | 1                         | 1                         | 1                        | 1                        |
| <i>fimA</i> |                           | 1                         |                          | 1                        |
| <i>fimE</i> |                           | 1                         |                          | 1                        |
| <i>fimF</i> |                           | 1                         |                          | 1                        |
| <i>fimG</i> |                           | 1                         | 1                        | 1                        |
| <i>fimH</i> |                           | 1                         | 1                        | 1                        |
| <i>fimI</i> |                           | 1                         |                          | 1                        |
| <i>fliP</i> | 1                         | 1                         | 1                        |                          |
| <i>guaA</i> | 1                         | 1                         | 1                        | 1                        |



|             |   |   |   |   |
|-------------|---|---|---|---|
| <i>malX</i> | 1 | 1 | 1 | 1 |
| <i>yadN</i> |   | 1 |   | 1 |

---

Note: "1" represents VF existing in all isolates of a given O serotype

**Table S8 Distribution of virulence factors in different O serotypes**

| <b>VFs</b>  | <b>O4</b> | <b>O8</b> | <b>O20</b> | <b>O15</b> | <b>O101</b> | <b>O141</b> | <b>O149</b> | <b>O174</b> |
|-------------|-----------|-----------|------------|------------|-------------|-------------|-------------|-------------|
| <i>Hcp</i>  | 1         | 1         |            | 1          | 1           | 1           | 1           | 1           |
| <i>aslA</i> |           |           |            | 1          | 1           | 1           |             |             |
| <i>astA</i> |           |           |            |            |             |             | 1           |             |
| <i>cadA</i> |           |           |            |            |             | 1           | 1           |             |
| <i>csgA</i> |           |           |            |            |             |             | 1           |             |
| <i>CsgC</i> | 1         | 1         | 1          | 1          | 1           |             | 1           | 1           |
| <i>dsdA</i> | 1         | 1         | 1          | 1          | 1           | 1           | 1           | 1           |
| <i>ecpA</i> | 1         | 1         |            | 1          | 1           | 1           |             | 1           |
| <i>ecpB</i> | 1         | 1         |            | 1          | 1           | 1           |             | 1           |
| <i>ecpC</i> | 1         | 1         |            | 1          | 1           | 1           |             | 1           |
| <i>ecpD</i> | 1         | 1         |            | 1          | 1           | 1           |             | 1           |
| <i>ecpE</i> | 1         | 1         |            | 1          | 1           | 1           |             | 1           |
| <i>ecpR</i> | 1         | 1         |            | 1          | 1           | 1           |             | 1           |
| <i>feoB</i> | 1         | 1         | 1          | 1          | 1           | 1           | 1           | 1           |
| <i>fepA</i> | 1         | 1         | 1          | 1          | 1           | 1           | 1           | 1           |
| <i>fimE</i> |           |           |            | 1          |             |             |             | 1           |
| <i>fimF</i> |           |           |            | 1          |             | 1           |             | 1           |
| <i>fimG</i> |           | 1         |            | 1          |             | 1           |             | 1           |
| <i>fimH</i> |           | 1         |            | 1          |             | 1           |             | 1           |
| <i>fimI</i> |           |           |            | 1          |             |             |             | 1           |
| <i>fliP</i> | 1         |           | 1          | 1          | 1           | 1           | 1           | 1           |

|             |   |   |   |   |   |   |   |   |
|-------------|---|---|---|---|---|---|---|---|
| <i>guaA</i> | 1 | 1 | 1 | 1 | 1 | 1 | 1 | 1 |
| <i>malX</i> | 1 | 1 | 1 | 1 | 1 | 1 | 1 | 1 |
| <i>traT</i> |   |   |   |   |   | 1 |   | 1 |
| <i>yadN</i> |   |   |   |   | 1 | 1 | 1 |   |

---

Note: "1" represents VF existing in all isolates of a given O serotype

**Table S9** *Stx* subtype information

| <b>Strain</b> | <b>Host</b> | <b>Collection year</b> | <b>Geographical location</b> | <b>Sample type</b> | <b>MLST type</b> | <b>O antigen</b> | <b>Pathotype</b> | <b><i>Stx</i> subtype</b> |
|---------------|-------------|------------------------|------------------------------|--------------------|------------------|------------------|------------------|---------------------------|
| sheep4        | sheep       | 2012                   | China : Qinghai              | feces              | 13               | O75              | STEC             | <i>stx1c+stx2b</i>        |
| sheep5        | sheep       | 2012                   | China : Qinghai              | feces              | 675              | O76              | STEC             | <i>stx1c</i>              |
| sheep11       | sheep       | 2013                   | China : Qinghai              | feces              | 40               | O174             | STEC             | <i>stx1c</i>              |
| sheep23       | sheep       | 2013                   | China : Qinghai              | feces              | 13               | O174             | STEC             | <i>stx1c</i>              |
| sheep24       | sheep       | 2013                   | China : Qinghai              | feces              | 278              | O20              | STEC             | <i>stx2b</i>              |
| sheep27       | sheep       | 2013                   | China : Qinghai              | feces              | 25               | O128             | STEC             | <i>stx2c</i>              |
| sheep30       | sheep       | 2013                   | China : Qinghai              | feces              | 13               | O174             | STEC             | <i>stx1c</i>              |
| sheep31       | sheep       | 2013                   | China : Qinghai              | feces              | 13               | O174             | STEC             | <i>stx1c</i>              |
| swine5        | swine       | 1979                   | China : Beijing              | rectum             | new1             | O139             | STEC             | <i>stx2e</i>              |
| swine9        | swine       | 1981                   | China : Beijing              | small intestine    | 5086             | O101             | STEC             | <i>stx2e</i>              |

|         |       |               |                  |                 |      |      |      |              |
|---------|-------|---------------|------------------|-----------------|------|------|------|--------------|
| swine19 | swine | 2014          | China : Jiangsu  | feces           | 4214 | O130 | STEC | <i>stx2e</i> |
| swine22 | swine | 2014          | China : Jiangsu  | feces           | 4214 | O130 | STEC | <i>stx2e</i> |
| swine24 | swine | 1979          | China : Beijing  | small intestine | 100  | O149 | STEC | <i>stx2e</i> |
| swine27 | swine | not collected | China : Beijing  | not collected   | 1    | O139 | STEC | <i>stx2e</i> |
| swine47 | swine | 2004          | China : Zhejiang | rectum          | 100  | O149 | STEC | <i>stx2e</i> |
| swine50 | swine | 2003          | China : Shandong | small intestine | 114  | O139 | STEC | <i>stx2e</i> |
| swine54 | swine | 2012          | China : Jiangsu  | rectum          | 4214 | O3   | STEC | <i>stx2e</i> |
| swine57 | swine | 2002          | China : Anhui    | rectum          | 10   | O141 | STEC | <i>stx2e</i> |
| swine67 | swine | 2012          | China : Jiangsu  | rectum          | 4214 | O3   | STEC | <i>stx2e</i> |
| swine68 | swine | 1999          | China : Jiangsu  | duodenum        | 10   | O141 | STEC | <i>stx2e</i> |

---

**Table S10 Antibiotic resistance of strains**

| <b>Strains</b> | <b>Geographical location</b> | <b>Ciprofloxacin</b> | <b>Ampicillin</b> | <b>Cefotaxime</b> | <b>Gentamicin</b> | <b>Kanamycin</b> | <b>Doxycycline</b> |
|----------------|------------------------------|----------------------|-------------------|-------------------|-------------------|------------------|--------------------|
| swine1         | China : Jilin                | S                    | R                 | S                 | S                 | I                | R                  |
| swine2         | China : Shanghai             | S                    | I                 | S                 | S                 | S                | R                  |
| swine3         | China : Beijing              | S                    | R                 | S                 | S                 | S                | S                  |
| swine4         | China : Beijing              | S                    | R                 | S                 | S                 | R                | R                  |
| swine5         | China : Beijing              | S                    | R                 | S                 | S                 | I                | R                  |
| swine6         | China : Guangxi              | S                    | I                 | S                 | S                 | S                | S                  |
| swine7         | China : Beijing              | S                    | R                 | S                 | S                 | R                | R                  |
| swine8         | China : Shanghai             | S                    | S                 | S                 | S                 | R                | R                  |
| swine9         | China : Beijing              | S                    | I                 | S                 | S                 | R                | R                  |
| swine10        | China : Shanghai             | S                    | R                 | S                 | S                 | I                | S                  |

|         |                  |   |   |   |   |   |   |
|---------|------------------|---|---|---|---|---|---|
| swine11 | China : Shanghai | S | R | S | S | S | S |
| swine12 | China : Zhejiang | S | R | S | S | I | R |
| swine13 | China : Beijing  | S | I | S | S | I | S |
| swine14 | China : Beijing  | S | I | S | S | I | R |
| swine15 | China : Beijing  | S | R | S | S | R | R |
| swine16 | China : Shanghai | R | R | S | S | I | S |
| swine18 | China : Beijing  | S | S | S | S | S | S |
| swine19 | China : Jiangsu  | I | R | S | S | R | R |
| swine20 | China : Jiangsu  | R | R | S | R | I | S |
| swine21 | China : Jiangsu  | S | S | S | S | S | R |
| swine22 | China : Jiangsu  | I | R | S | S | R | R |
| swine23 | China : Jiangsu  | R | R | I | R | R | R |
| swine24 | China : Beijing  | S | S | S | S | S | R |

|         |                 |   |   |   |   |   |   |
|---------|-----------------|---|---|---|---|---|---|
| swine25 | China : Beijing | S | I | S | S | S | S |
| swine26 | China : Beijing | S | I | S | S | S | S |
| swine27 | China : Beijing | S | I | S | S | S | S |
| swine28 | China : Jiangsu | R | R | R | S | R | R |
| swine29 | China : Jiangsu | R | R | S | R | I | R |
| swine30 | China : Jiangsu | R | R | I | R | R | R |
| swine31 | China : Jiangsu | I | R | S | S | R | R |
| swine32 | China : Jiangsu | S | R | S | I | R | R |
| swine33 | China : Jiangsu | R | R | S | S | I | R |
| swine34 | China : jiangxi | R | R | S | R | R | R |
| swine35 | China : Jiangsu | R | R | S | R | R | R |
| swine36 | China : Jiangxi | S | S | S | S | S | I |
| swine37 | China : Jiangsu | S | R | S | R | I | I |



|         |                  |   |   |   |   |   |   |
|---------|------------------|---|---|---|---|---|---|
| swine38 | China : Jiangsu  | R | R | S | R | R | R |
| swine39 | China : Jiangsu  | R | R | S | R | R | I |
| swine40 | China : Jiangsu  | R | R | S | R | R | S |
| swine41 | China : Anhui    | S | R | S | R | R | R |
| swine42 | China : Jiangsu  | R | R | S | R | I | R |
| swine43 | China : Jiangsu  | R | R | R | R | R | R |
| swine44 | China : Jiangsu  | S | R | R | R | R | I |
| swine45 | China : Zhejiang | R | R | S | R | R | R |
| swine46 | China : Jiangsu  | R | R | S | R | R | I |
| swine47 | China : Zhejiang | R | R | S | R | R | I |
| swine48 | China : Jiangsu  | R | R | S | R | R | R |
| swine49 | China : Jiangsu  | R | R | R | S | R | R |
| swine50 | China : Shandong | S | S | S | S | S | S |

|         |                   |   |   |   |   |   |   |
|---------|-------------------|---|---|---|---|---|---|
| swine51 | China : Guangdong | S | R | S | R | I | R |
| swine52 | China : Jiangsu   | R | R | S | R | R | R |
| swine53 | China : Jiangsu   | R | R | S | S | R | R |
| swine54 | China : Jiangsu   | I | R | S | S | R | R |
| swine55 | China : Jiangsu   | S | I | S | R | I | R |
| swine56 | China : Jiangsu   | S | R | S | R | S | R |
| swine57 | China : Anhui     | R | R | I | R | R | R |
| swine58 | China : Guangdong | I | I | S | S | R | R |
| swine59 | China : Jiangsu   | R | R | S | R | I | R |
| swine60 | China             | R | R | S | R | I | R |
| swine61 | China : Jiangsu   | S | R | R | R | R | R |
| swine62 | China : Jiangsu   | R | R | S | R | R | R |
| swine63 | China : Jiangsu   | S | R | S | R | I | I |

|         |                 |   |   |   |   |   |   |
|---------|-----------------|---|---|---|---|---|---|
| swine64 | China : Jiangsu | R | R | S | R | R | R |
| swine65 | China : Jiangsu | R | R | R | R | R | R |
| swine66 | China : Jiangsu | R | R | S | R | R | R |
| swine67 | China : Jiangsu | I | R | S | S | R | R |
| swine68 | China : Jiangsu | R | R | S | S | R | I |
| swine70 | China : Jiangsu | R | I | I | S | R | I |
| swine71 | China : Jiangxi | R | I | S | R | R | R |
| swine72 | China : Jiangxi | I | R | S | S | R | R |
| sheep1  | China : Qinghai | S | S | S | S | S | S |
| sheep2  | China : Qinghai | S | I | S | S | S | I |
| sheep3  | China : Qinghai | S | R | S | S | I | R |
| sheep4  | China : Qinghai | S | S | S | S | S | S |

|         |                 |   |   |   |   |   |   |
|---------|-----------------|---|---|---|---|---|---|
| sheep5  | China : Qinghai | S | S | S | S | S | S |
| sheep6  | China : Qinghai | S | S | S | S | S | S |
| sheep7  | China : Qinghai | S | I | S | S | S | R |
| sheep8  | China : Qinghai | S | S | S | S | S | R |
| sheep9  | China : Qinghai | S | S | S | S | S | R |
| sheep10 | China : Qinghai | S | S | S | S | S | S |
| sheep11 | China : Qinghai | S | S | S | S | S | S |
| sheep12 | China : Qinghai | S | I | I | S | S | I |
| sheep13 | China : Qinghai | S | S | S | S | I | S |
| sheep14 | China : Qinghai | S | S | S | S | S | S |
| sheep15 | China : Qinghai | S | S | S | S | S | S |
| sheep16 | China : Qinghai | S | I | S | S | S | S |
| sheep17 | China : Qinghai | S | I | S | S | S | S |

|         |                 |   |   |   |   |   |   |
|---------|-----------------|---|---|---|---|---|---|
| sheep18 | China : Qinghai | S | S | S | S | S | S |
| sheep19 | China : Qinghai | S | I | S | S | S | S |
| sheep20 | China : Qinghai | S | S | S | S | S | S |
| sheep21 | China : Qinghai | S | I | S | S | S | S |
| sheep22 | China : Qinghai | S | S | S | S | S | I |
| sheep23 | China : Qinghai | S | S | S | S | S | S |
| sheep24 | China : Qinghai | S | S | S | S | S | S |
| sheep25 | China : Qinghai | S | S | S | S | S | S |
| sheep26 | China : Qinghai | S | S | S | S | S | S |
| sheep27 | China : Qinghai | S | R | S | S | S | S |
| sheep28 | China : Qinghai | S | S | S | S | S | S |
| sheep29 | China : Qinghai | R | R | S | R | R | R |
| sheep30 | China : Qinghai | S | I | S | S | S | S |

|         |                 |   |   |   |   |   |   |
|---------|-----------------|---|---|---|---|---|---|
| sheep31 | China : Qinghai | S | S | S | S | S | S |
| sheep32 | China : Qinghai | S | S | S | S | S | S |
| sheep33 | China : Qinghai | R | R | R | S | R | R |
| sheep34 | China : Qinghai | S | R | S | S | S | I |
| sheep35 | China : Qinghai | R | R | R | S | R | R |
| sheep36 | China : Qinghai | S | R | S | S | S | R |
| sheep37 | China : Qinghai | R | R | S | S | R | R |
| sheep38 | China : Qinghai | R | R | I | R | R | S |
| sheep39 | China : Qinghai | R | R | R | S | I | S |
| sheep40 | China : Qinghai | S | S | S | S | S | R |
| sheep41 | China : Qinghai | R | R | S | S | S | R |
| sheep42 | China : Qinghai | S | R | S | S | S | S |
| sheep43 | China : Qinghai | S | S | S | S | I | S |

|         |                   |   |   |   |   |   |   |
|---------|-------------------|---|---|---|---|---|---|
| sheep44 | China : Qinghai   | S | S | S | S | S | S |
| sheep45 | China : Qinghai   | S | R | S | S | S | R |
| sheep46 | China : Qinghai   | S | R | S | S | I | S |
| sheep47 | China : Qinghai   | S | R | R | S | S | S |
| sheep48 | China : Qinghai   | R | R | S | R | R | R |
| sheep49 | China : Qinghai   | S | R | R | S | S | S |
| sheep50 | China : Qinghai   | S | I | S | S | I | S |
| sheep51 | China : Qinghai   | S | I | S | S | S | S |
| sheep52 | China : Qinghai   | S | I | S | S | S | S |
| sheep53 | China : Qinghai   | S | S | S | S | S | S |
| sheep54 | China : Qinghai   | S | S | S | S | S | S |
| sheep55 | China : Neimenggu | S | R | S | R | S | R |
| sheep56 | China : Neimenggu | S | S | S | S | S | S |

sheep57 China : Xinjiang S R S S R R

---

Note: "R", Resistant; "I", Intermediate; "S", Sensitive



**Table S11 Reference *E.coli* genomes**

| <b>No.</b> | <b>Strain</b>              | <b>Accession No.</b>   |
|------------|----------------------------|------------------------|
| 1          | Sakai substr. RIMD 0509952 | NC_002695.1/BA000007.2 |
| 2          | UMN026                     | NC_011751.1/CU928163.2 |
| 3          | IAI39                      | NC_011750.1/CU928164.2 |
| 4          | K-12 substr. MG1655        | NC_000913.3/U00096.3   |
| 5          | NRG 857C                   | NC_017634.1/CP001855.1 |
| 6          | 2011C-3493                 | NC_018658.1/CP003289.1 |
| 7          | CFT073                     | NC_004431.1/AE014075.1 |
| 8          | BL21(DE3)                  | NC_012892.2/AM946981.2 |
| 9          | K-12 substr. W3110         | NC_007779.1/AP009048.1 |
| 10         | SE11                       | NC_011415.1/AP009240.1 |
| 11         | SE15                       | NC_013654.1/AP009378.1 |
| 12         | 12009                      | NC_013353.1/AP010958.1 |
| 13         | 11128                      | NC_013364.1/AP010960.1 |
| 14         | UTI89                      | NC_007946.1/CP000243.1 |
| 15         | 536                        | NC_008253.1/CP000247.1 |
| 16         | E24377A                    | NC_009801.1/CP000800.1 |
| 17         | HS                         | NC_009800.1/CP000802.1 |
| 18         | REL606                     | NC_012967.1/CP000819.1 |
| 19         | ATCC 8739                  | NC_010468.1/CP000946.1 |
| 20         | K-12 substr. DH10B         | NC_010473.1/CP000948.1 |
| 21         | SMS-3-5                    | NC_010498.1/CP000970.1 |
| 22         | EC4115                     | NC_011353.1/CP001164.1 |
| 23         | TW14359                    | NC_013008.1/CP001368.1 |

|    |                        |                          |
|----|------------------------|--------------------------|
| 24 | K-12 substr. BW2952    | NC_012759.1/CP001396.1   |
| 25 | BL21(DE3)              | NC_012971.2/CP001509.3   |
| 26 | DH1                    | NC_017625.1/CP001637.1   |
| 27 | BL21-Gold(DE3)pLysS AG | NC_012947.1/CP001665.1   |
| 28 | CB9615                 | NC_013941.1/CP001846.1   |
| 29 | IHE3034                | NC_017628.1/CP001969.1   |
| 30 | 55989                  | NC_011748.1/CU928145.2   |
| 31 | IAI1                   | NC_011741.1/CU928160.2   |
| 32 | S88                    | CU928161.2               |
| 33 | E2348/69               | NC_011601.1/FM180568.1   |
| 34 | 42                     | NC_017626.1/FN554766.1   |
| 35 | 11368                  | NC_013361.1/AP010953.1   |
| 36 | KO11                   | NC_016902.1/CP002516.1   |
| 37 | ABU 83972              | NC_017631.1/CP001671.1   |
| 38 | UM146                  | NC_017632.1/CP002167.1   |
| 39 | W                      | NC_017635.1/CP002185.1   |
| 40 | ETEC H10407            | NC_017633.1/FN649414.1   |
| 41 | UMNK88                 | NC_017641.1/CP002729.1   |
| 42 | NA114                  | NC_017644.1/CP002797.2   |
| 43 | PCN033                 | NZ_CP006632.1/CP006632.1 |
| 44 | CE10                   | NC_017646.1/CP003034.1   |
| 45 | clone D i2             | NC_017651.1/CP002211.1   |
| 46 | clone D i14            | NC_017652.1/CP002212.1   |
| 47 | RM12579                | NC_017656.1/CP003109.1   |
| 48 | P12b                   | NC_017663.1/CP002291.1   |
| 49 | KO11FL                 | NC_017660.1/CP002970.1   |

|    |                     |                          |
|----|---------------------|--------------------------|
| 50 | W                   | NC_017664.1/CP002967.1   |
| 51 | Xuzhou21            | NC_017906.1/CP001925.1   |
| 52 | DH1                 | NC_017638.1/AP012030.1   |
| 53 | LF82                | NC_011993.1/CU651637.1   |
| 54 | EC958               | NZ_HG941718.1/HG941718.1 |
| 55 | 2009EL-2050         | NC_018650.1/CP003297.1   |
| 56 | 2009EL-2071         | NC_018661.1/CP003301.1   |
| 57 | K-12 substr. MDS42  | NC_020518.1/AP012306.1   |
| 58 | LY180               | NC_022364.1/CP006584.1   |
| 59 | C321.deltaA         | CP006698.1               |
| 60 | JJ1886              | NC_022648.1/CP006784.1   |
| 61 | K-12 substr. MC4100 | NZ_HG738867.1/HG738867.1 |
| 62 | RM13514             | NZ_CP006027.1/CP006027.1 |
| 63 | RM13516             | NZ_CP006262.1/CP006262.1 |
| 64 | ST540               | NZ_CP007265.1/CP007265.1 |
| 65 | ST540               | NZ_CP007390.1/CP007390.1 |
| 66 | ST540               | NZ_CP007391.1/CP007391.1 |
| 67 | ST2747              | NZ_CP007392.1/CP007392.1 |
| 68 | ST2747              | NZ_CP007393.1/CP007393.1 |
| 69 | ST2747              | NZ_CP007394.1/CP007394.1 |
| 70 | RM12761             | NZ_CP007133.1/CP007133.1 |
| 71 | RM12581             | NZ_CP007136.1/CP007136.1 |
| 72 | Nissle 1917         | NZ_CP007799.1/CP007799.1 |
| 73 | KLY                 | NZ_CP008801.1/CP008801.1 |
| 74 | SS17                | NZ_CP008805.1/CP008805.1 |
| 75 | EDL933              | NZ_CP008957.1/CP008957.1 |

|     |                      |                          |
|-----|----------------------|--------------------------|
| 76  | ATCC 25922           | NZ_CP009072.1/CP009072.1 |
| 77  | K-12 substr. BW25113 | NZ_CP009273.1/CP009273.1 |
| 78  | ECONIH1              | NZ_CP009859.1/CP009859.1 |
| 79  | ER2796               | NZ_CP009644.1/CP009644.1 |
| 80  | ER3413               | NZ_CP009789.1/CP009789.1 |
| 81  | RS218                | NZ_CP007149.1/CP007149.1 |
| 82  | RM9387               | NZ_CP009104.1/CP009104.1 |
| 83  | 94-3024              | NZ_CP009106.2/CP009106.2 |
| 84  | K-12 substr. MG1655  | NZ_CP009685.1/CP009685.1 |
| 85  | SS52                 | NZ_CP010304.1/CP010304.1 |
| 86  | 6409                 | NZ_CP010371.1/CP010371.1 |
| 87  | -                    | NZ_CP010315.1/CP010315.1 |
| 88  | Santai               | NZ_CP007592.1/CP007592.1 |
| 89  | 1303                 | NZ_CP009166.1/CP009166.1 |
| 90  | C41(DE3)             | NZ_CP010585.1/CP010585.1 |
| 91  | ECC-1470             | NZ_CP010344.1/CP010344.1 |
| 92  | BL21 (TaKaRa)        | NZ_CP010816.1/CP010816.1 |
| 93  | MNCRE44              | NZ_CP010876.1/CP010876.1 |
| 94  | K-12 substr. RV308   | NZ_LM995446.1/LM995446.1 |
| 95  | K-12 substr. HMS174  | NZ_LM993812.1/LM993812.1 |
| 96  | HUSEC2011            | NZ_HF572917.1/HF572917.2 |
| 97  | VR50                 | NZ_CP011134.1/CP011134.1 |
| 98  | CI5                  | NZ_CP011018.1/CP011018.1 |
| 99  | ER3454               | NZ_CP010438.1/CP010438.1 |
| 100 | ER3440               | NZ_CP010439.1/CP010439.1 |
| 101 | ER3476               | NZ_CP010440.1/CP010440.1 |

|     |                     |                          |
|-----|---------------------|--------------------------|
| 102 | ER3445              | NZ_CP010441.1/CP010441.1 |
| 103 | ER3466              | NZ_CP010442.1/CP010442.1 |
| 104 | ER3446              | NZ_CP010443.1/CP010443.1 |
| 105 | ER3475              | NZ_CP010444.1/CP010444.1 |
| 106 | ER3435              | NZ_CP010445.1/CP010445.1 |
| 107 | K-12 substr. AG100  | NZ_LN832404.1/LN832404.1 |
| 108 | C227-11             | NZ_CP011331.1/CP011331.1 |
| 109 | SEC470              | NZ_CP007594.1/CP007594.1 |
| 110 | SQ37                | NZ_CP011320.1/CP011320.1 |
| 111 | SQ88                | NZ_CP011321.1/CP011321.1 |
| 112 | SQ2203              | NZ_CP011324.1/CP011324.1 |
| 113 | CFSAN029787         | NZ_CP011416.1/CP011416.1 |
| 114 | K-12 substr. GM4792 | NZ_CP011342.2/CP011342.2 |
| 115 | K-12 substr. GM4792 | NZ_CP011343.2/CP011343.2 |
| 116 | PCN061              | NZ_CP006636.1/CP006636.1 |
| 117 | C43(DE3)            | NZ_CP011938.1/CP011938.1 |
| 118 | NCM3722             | NZ_CP011495.1/CP011495.1 |
| 119 | DH1Ec095            | NZ_CP012125.1/CP012125.1 |
| 120 | DH1Ec104            | NZ_CP012126.1/CP012126.1 |
| 121 | DH1Ec169            | NZ_CP012127.1/CP012127.1 |
| 122 | RR1                 | NZ_CP011113.1/CP011113.1 |
| 123 | SF-088              | NZ_CP012635.1/CP012635.1 |
| 124 | SF-468              | NZ_CP012625.1/CP012625.1 |
| 125 | SF-166              | NZ_CP012633.1/CP012633.1 |
| 126 | SF-173              | NZ_CP012631.1/CP012631.1 |
| 127 | WS4202              | NZ_CP012802.1/CP012802.1 |

|     |                              |                          |
|-----|------------------------------|--------------------------|
| 128 | K-12 substr. MG1655          | NZ_CP012868.1/CP012868.1 |
| 129 | K-12 substr. MG1655_TMP32XR1 | NZ_CP012869.1/CP012869.1 |
| 130 | K-12 substr. MG1655_TMP32XR2 | NZ_CP012870.1/CP012870.1 |
| 131 | 2012C-4227                   | NZ_CP013029.1/CP013029.1 |
| 132 | 2009C-3133                   | NZ_CP013025.1/CP013025.1 |
| 133 | YD786                        | NZ_CP013112.1/CP013112.1 |
| 134 | CQSW20                       | NZ_CP013253.1/CP013253.1 |
| 135 | uk_P46212                    | NZ_CP013658.1/CP013658.1 |
| 136 | ST648                        | NZ_CP008697.1/CP008697.1 |
| 137 | CD306                        | NZ_CP013831.1/CP013831.1 |
| 138 | JJ2434                       | NZ_CP013835.1/CP013835.1 |
| 139 | JJ1897                       | CP013837.1               |
| 140 | ACN002                       | NZ_CP007491.1/CP007491.1 |
| 141 | MRE600                       | NZ_CP014197.1/CP014197.1 |
| 142 | K-12 substr. MG1655          | NZ_CP014225.1/CP014225.1 |
| 143 | JEONG-1266                   | NZ_CP014314.1/CP014314.1 |
| 144 | C2566                        | NZ_CP014268.2/CP014268.2 |
| 145 | C3029                        | NZ_CP014269.1/CP014269.1 |
| 146 | DHB4                         | NZ_CP014270.1/CP014270.1 |
| 147 | C3026                        | NZ_CP014272.1/CP014272.1 |
| 148 | JW5437-1 substr. MG1655      | NZ_CP014348.1/CP014348.1 |
| 149 | SaT040                       | NZ_CP014495.1/CP014495.1 |
| 150 | G749                         | NZ_CP014488.1/CP014488.1 |
| 151 | MVAST0167                    | NZ_CP014492.1/CP014492.1 |
| 152 | ZH193                        | NZ_CP014497.1/CP014497.1 |
| 153 | ZH063                        | NZ_CP014522.1/CP014522.1 |

|     |            |                          |
|-----|------------|--------------------------|
| 154 | JJ1887     | NZ_CP014316.1/CP014316.1 |
| 155 | Sanji      | NZ_CP011061.1/CP011061.1 |
| 156 | 28RC1      | NZ_CP015020.1/CP015020.1 |
| 157 | SRCC 1675  | NZ_CP015023.1/CP015023.1 |
| 158 | Ecol_732   | NZ_CP015138.1/CP015138.1 |
| 159 | Ecol_743   | NZ_CP015069.1/CP015069.1 |
| 160 | Ecol_745   | NZ_CP015074.2/CP015074.2 |
| 161 | Ecol_448   | NZ_CP015076.1/CP015076.1 |
| 162 | 2011C-3911 | NZ_CP015240.1/CP015240.1 |
| 163 | 2013C-4465 | NZ_CP015241.1/CP015241.1 |
| 164 | 180-PT54   | NZ_CP015832.1/CP015832.1 |
| 165 | 644-PT8    | NZ_CP015831.1/CP015831.1 |
| 166 | FRIK2069   | NZ_CP015846.1/CP015846.1 |
| 167 | FRIK2533   | NZ_CP015842.1/CP015842.1 |
| 168 | FRIK2455   | NZ_CP015843.1/CP015843.1 |
| 169 | S51        | NZ_CP015995.1/CP015995.1 |
| 170 | NGF1       | NZ_CP016007.1/CP016007.1 |
| 171 | ER1821R    | NZ_CP016018.1/CP016018.1 |
| 172 | Eco889     | NZ_CP015159.1/CP015159.1 |
| 173 | ECONIH2    | NZ_CP014667.1/CP014667.1 |
| 174 | 06-00048   | NZ_CP015229.1/CP015229.1 |
| 175 | 09-00049   | NZ_CP015228.1/CP015228.1 |
| 176 | 08-00022   | NZ_CP013662.1/CP013662.1 |
| 177 | H1827/12   | NZ_CP013031.1/CP013031.1 |
| 178 | GB089      | NZ_CP013663.1/CP013663.1 |
| 179 | 210205630  | NZ_CP015912.1/CP015912.1 |

|     |                         |                                  |
|-----|-------------------------|----------------------------------|
| 180 | EC590                   | NZ_CP016182.1/CP016182.1         |
| 181 | K-15KW01                | NZ_CP016358.1/CP016358.1         |
| 182 | UPEC 26-1               | NZ_CP016497.1/CP016497.1         |
| 183 | O177:H21                | NZ_CP016546.1/CP016546.1         |
| 184 | FRIK944                 | NZ_CP016625.1/CP016625.1         |
| 185 | EDL933                  | NC_002655.2/AE005174.2           |
| 186 | ED1a                    | NC_011745.1/CU928162.2           |
| 187 | FAP1                    | NZ_CP009578.1/CP009578.1         |
| 188 | MC1061                  | LN877770.1                       |
| 189 | RS76                    | NZ_CP013048.1/CP013048.1         |
| 190 | SEC470                  | CP013962.1                       |
| 191 | EDL933-1                | NZ_CP015855.1/CP015855.1         |
| 192 | K-12 substr. MG1655star | NZ_CM000960.1/CM000960.1         |
| 193 | TW14588                 | NZ_CM000662.1/CM000662.1         |
| 194 | UMNF18                  | NZ_AGTD01000001.1/AGTD01000001.1 |
| 195 | K-12 substr. MG1655     | NZ_AKBV01000001.1/AKBV01000001.1 |
| 196 | K-12 substr. MG1655     | NZ_AKVX01000001.1/AKVX01000001.1 |
| 197 | PMV-1                   | NC_022370.1/HG428755.1           |
| 198 | PPECC42                 | PPECC42:NZ_CM003707.1/CM003707.1 |
| 199 | 268-78-1                | NZ_CP014092.1/CP014092.1         |

---



**Table S12 Accession No. of strains**

| <b>Strain</b> | <b>Accession No.</b> |
|---------------|----------------------|
| swine1        | LVMD00000000         |
| swine2        | LVME00000000         |
| swine3        | LVMF00000000         |
| swine4        | LVMG00000000         |
| swine5        | LVMH00000000         |
| swine6        | LVMJ00000000         |
| swine7        | LVMK00000000         |
| swine8        | LVMJ00000000         |
| swine9        | LVML00000000         |
| swine10       | LVMN00000000         |
| swine11       | LVMN00000000         |
| swine12       | LVMO00000000         |
| swine13       | LVMQ00000000         |
| swine14       | LVMQ00000000         |
| swine15       | LVMR00000000         |
| swine16       | LVMS00000000         |
| swine18       | LVMU00000000         |
| swine19       | LVMV00000000         |
| swine20       | LVMW00000000         |
| swine21       | LVMX00000000         |
| swine22       | LVMY00000000         |
| swine23       | LVMZ00000000         |
| swine24       | LVNA00000000         |

|         |              |
|---------|--------------|
| swine25 | LVNB00000000 |
| swine26 | LVNC00000000 |
| swine27 | LVND00000000 |
| swine28 | LVNE00000000 |
| swine29 | LVNF00000000 |
| swine30 | LVNG00000000 |
| swine31 | LVNH00000000 |
| swine32 | LVNI00000000 |
| swine33 | LVNJ00000000 |
| swine34 | LVNK00000000 |
| swine35 | LVNL00000000 |
| swine36 | LVNM00000000 |
| swine37 | LVNN00000000 |
| swine38 | LVNO00000000 |
| swine39 | LVNP00000000 |
| swine40 | LVNQ00000000 |
| swine41 | LVNR00000000 |
| swine42 | LVNS00000000 |
| swine43 | LVNT00000000 |
| swine44 | LVNU00000000 |
| swine45 | LVNV00000000 |
| swine46 | LVNW00000000 |
| swine47 | LVNX00000000 |
| swine48 | LVNY00000000 |
| swine49 | LVNZ00000000 |
| swine50 | LVOA00000000 |

|         |              |
|---------|--------------|
| swine51 | LVOB00000000 |
| swine52 | LVOC00000000 |
| swine53 | LVOD00000000 |
| swine54 | LVOE00000000 |
| swine55 | LVOF00000000 |
| swine56 | LVOG00000000 |
| swine57 | LVOH00000000 |
| swine58 | LVOI00000000 |
| swine59 | LVOJ00000000 |
| swine60 | LVOK00000000 |
| swine61 | LVOL00000000 |
| swine62 | LVOM00000000 |
| swine63 | LVON00000000 |
| swine64 | LVOO00000000 |
| swine65 | LVOP00000000 |
| swine66 | LVOP00000000 |
| swine67 | LVOR00000000 |
| swine68 | LVOS00000000 |
| swine70 | LVOT00000000 |
| swine71 | LVOU00000000 |
| swine72 | LVOV00000000 |
| sheep1  | LVOW00000000 |
| sheep2  | LVOX00000000 |
| sheep3  | LVOY00000000 |
| sheep4  | LVOZ00000000 |
| sheep5  | LVPA00000000 |

|         |               |
|---------|---------------|
| sheep6  | LVPB00000000  |
| sheep7  | LVPC00000000  |
| sheep8  | LVPD00000000  |
| sheep9  | LVPE00000000  |
| sheep10 | LVPF00000000  |
| sheep11 | LVPG00000000  |
| sheep12 | LVPH00000000  |
| sheep13 | LVPI00000000  |
| sheep14 | LVPJ00000000  |
| sheep15 | LVPK00000000  |
| sheep16 | LVPL00000000  |
| sheep17 | LVPM00000000  |
| sheep18 | LVPN00000000  |
| sheep19 | LVPO00000000  |
| sheep20 | LVPP00000000  |
| sheep21 | LV PQ00000000 |
| sheep22 | LVPR00000000  |
| sheep23 | LVPS00000000  |
| sheep24 | LVPT00000000  |
| sheep25 | LVPU00000000  |
| sheep26 | LV PV00000000 |
| sheep27 | LV PW00000000 |
| sheep28 | LV PX00000000 |
| sheep29 | LV PY00000000 |
| sheep30 | LV PZ00000000 |
| sheep31 | LVQA00000000  |

|         |              |
|---------|--------------|
| sheep32 | LVQB00000000 |
| sheep33 | LVQC00000000 |
| sheep34 | LVQD00000000 |
| sheep35 | LVQE00000000 |
| sheep36 | LVQF00000000 |
| sheep37 | LVQG00000000 |
| sheep38 | LVQH00000000 |
| sheep39 | LVQI00000000 |
| sheep40 | LVQJ00000000 |
| sheep41 | LVQK00000000 |
| sheep42 | LVQL00000000 |
| sheep43 | LVQM00000000 |
| sheep44 | LVQN00000000 |
| sheep45 | LVQO00000000 |
| sheep46 | LVQP00000000 |
| sheep47 | LVQQ00000000 |
| sheep48 | LVQR00000000 |
| sheep49 | LVQS00000000 |
| sheep50 | LVQT00000000 |
| sheep51 | LVQU00000000 |
| sheep52 | LVQV00000000 |
| sheep53 | LVQW00000000 |
| sheep54 | LVQX00000000 |
| sheep55 | LVQY00000000 |
| sheep56 | LVQZ00000000 |
| sheep57 | LVRA00000000 |

---
